# Supplementary material for: Geometrically constrained square pyramidal phosphoranide
Source: Royal Society of Chemistry journal article supplement (doi:10.1039/d2sc01060g), 2022-01-01
Supplement: d2sc01060g1.pdf [file d2sc01060g1.pdf]

## SUPPORTING INFORMATION

---

### **Geometrically Distorted Square Pyramidal Phosphoranide**

Solomon Volodarsky,<sup>†</sup> Irina Malahov,<sup>†</sup> Deependra Bawari, Mohanad Diab, Naveen Malik, Boris Tumanskii, and Roman Dobrovetsky\*

## SUPPORTING INFORMATION

---

### Table of Contents

|                                             |     |
|---------------------------------------------|-----|
| 1. General experimental considerations..... | S3  |
| 2. X-ray Crystallography.....               | S3  |
| 3. Experimental procedures.....             | S3  |
| 4. Electrochemistry.....                    | S20 |
| 5. EPR experiments.....                     | S21 |
| 6. DFT Computations.....                    | S25 |
| 7. References.....                          | S37 |

**1. General experimental considerations:** All preparations were carried out under an anhydrous N<sub>2</sub> atmosphere using standard Schlenk and glove box techniques. All glassware was oven dried and cooled under vacuum before use. Commercial reagents were purchased from Sigma Aldrich, Strem or Apollo Scientific and used without further purification unless indicated otherwise. **2** was prepared following the reported procedures.<sup>[1]</sup> NMR spectra were recorded at room temperature using a Bruker AvanceIII-400 MHz spectrometer. Data for <sup>1</sup>H NMR are reported as follows: chemical shift ( $\delta$  ppm), integration, multiplicity (s = singlet, d = doublet, t = triplet, q = quartet, quin = quintet, m = multiplet, br = broad), coupling constant (Hz), assignment.

## 2. X-ray Crystallography:

Single crystal X-ray diffraction data were collected on a Bruker KAPPA APEX II diffractometer equipped with an APEX II CCD detector using a TRIUMPH monochromator with a MoK $\alpha$  X-ray source ( $\alpha = 0.71073 \text{ \AA}$ ). The crystals were mounted on a cryoloop with Paratone oil, and all data were collected at 100(2) K. Unit cell determination and refinement and data collection were done using the Bruker APPEX-II suite,<sup>[2]</sup> data reduction and integration were performed using SAINT v8.34A (Bruker, 2013)<sup>[3]</sup> and absorption corrections and scaling were done using SADABS-2014/5 (Bruker, 2014/5)<sup>[4]</sup>. All the crystal structures were solved through OLEX2<sup>[5]</sup> package using SHELXT<sup>[6]</sup> and the structures were refined using SHELXL<sup>[6]</sup>. All non-hydrogen atoms were refined anisotropically. All the figures were generated using Mercury 3.10.2.

## 3. Experimental Procedures

### Synthesis of 1-H:

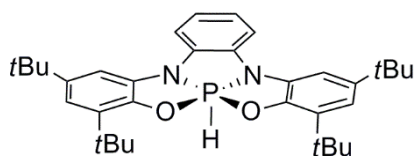

PCl<sub>3</sub> (0.47 mL, 5.34 mmol) was added to a THF (70 mL) solution of compound **2** (2.3 g, 4.45 mmol) at r.t., after 5 min followed by the addition of Et<sub>3</sub>N (2.5 mL, 17.8 mmol). This mixture was stirred at r.t. overnight. The solution was filtered by cannula and thereafter all the volatiles were evaporated under vacuum. The light yellow solid was washed with acetonitrile (50 mL) that afforded white solid. This solid was crystallized by slow evaporation of acetonitrile-DCM mixture (3:1) at room temperature. Yield: 1.2 g (49.59 %).

**<sup>1</sup>H NMR (400 MHz, CDCl<sub>3</sub>);**  $\delta$  = 8.79 (d, 1H,  $J_{H-P}$  = 784 Hz, -PH), 7.65 (m, 2H, Ar-H), 7.55 (s, 2H, Ar-H), 7.12 (m, 2H, Ar-H), 7.04 (s, 2H, Ar-H), 1.51 (s, 18H, -C(CH<sub>3</sub>)<sub>3</sub>), 1.43 (s, 18H, -C(CH<sub>3</sub>)<sub>3</sub>) ppm. **<sup>13</sup>C NMR (100 MHz, CDCl<sub>3</sub>);**  $\delta$  = 144.12, 139.90, 133.60 (d,  $J$  = 9 Hz), 130.32 (d,  $J$  = 14 Hz), 130.05 (d,  $J$  = 20 Hz), 121.08, 116.19, 110.59 (d,  $J$  = 10 Hz), 107.20 (d,  $J$  = 9 Hz), 35.17 (-C(CH<sub>3</sub>)<sub>3</sub>), 34.71 (-C(CH<sub>3</sub>)<sub>3</sub>), 32.00 (-C(CH<sub>3</sub>)<sub>3</sub>), 29.72 (-C(CH<sub>3</sub>)<sub>3</sub>) ppm. **<sup>31</sup>P NMR (162 MHz, CDCl<sub>3</sub>);**  $\delta$  = -40.21 (d,  $J_{P-H}$  = 782 Hz) ppm. **HRMS (ES<sup>+</sup>):** Calculated for C<sub>34</sub>H<sub>46</sub>N<sub>2</sub>O<sub>2</sub>P: 545.3297 [M+H]<sup>+</sup>; Obs: 545.3292. **EA:** Calc'd for C<sub>34</sub>H<sub>46</sub>N<sub>2</sub>O<sub>2</sub>P: C, 74.97; H, 8.33; N, 5.14; Obs: C, 74.91; H, 8.37; N, 5.12.

# SUPPORTING INFORMATION

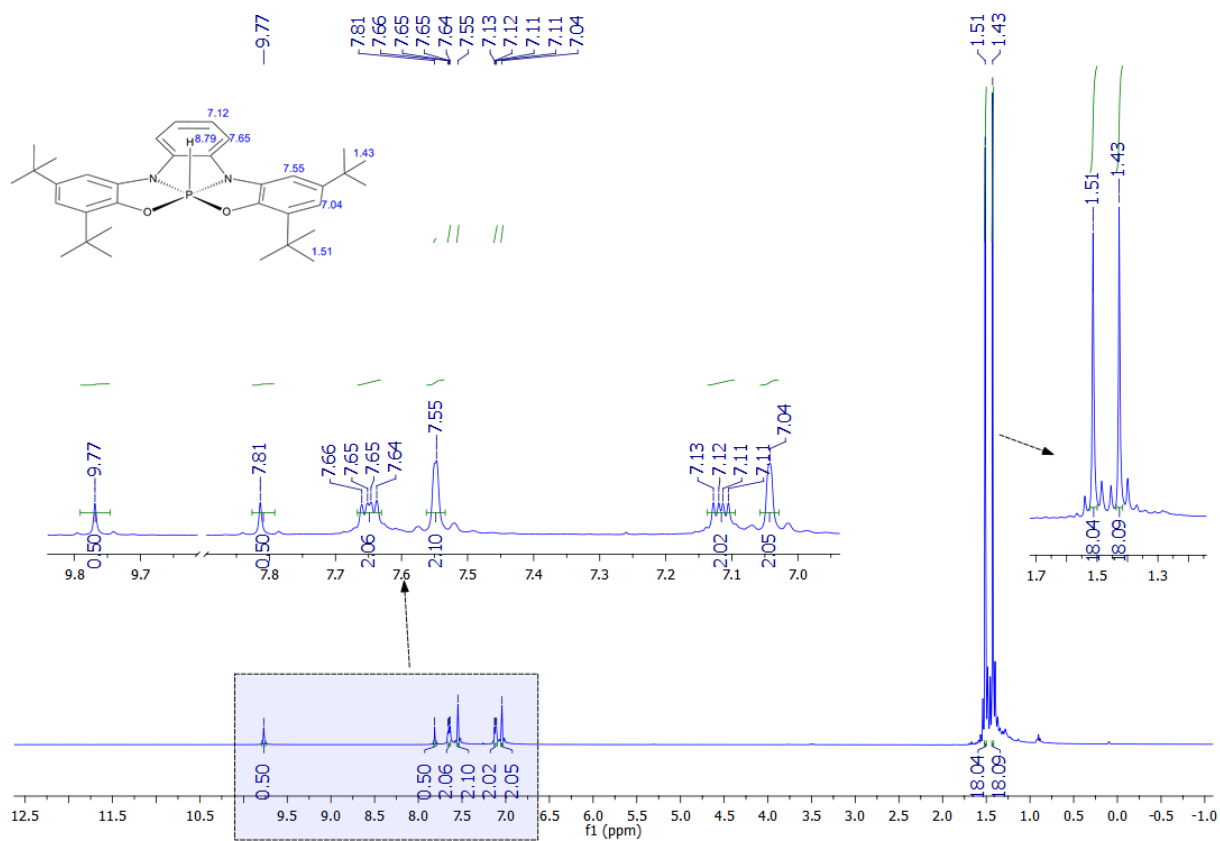

**Figure S1.**  $^1\text{H}$  NMR spectrum (400 MHz,  $\text{CDCl}_3$ ) of **1-H**.

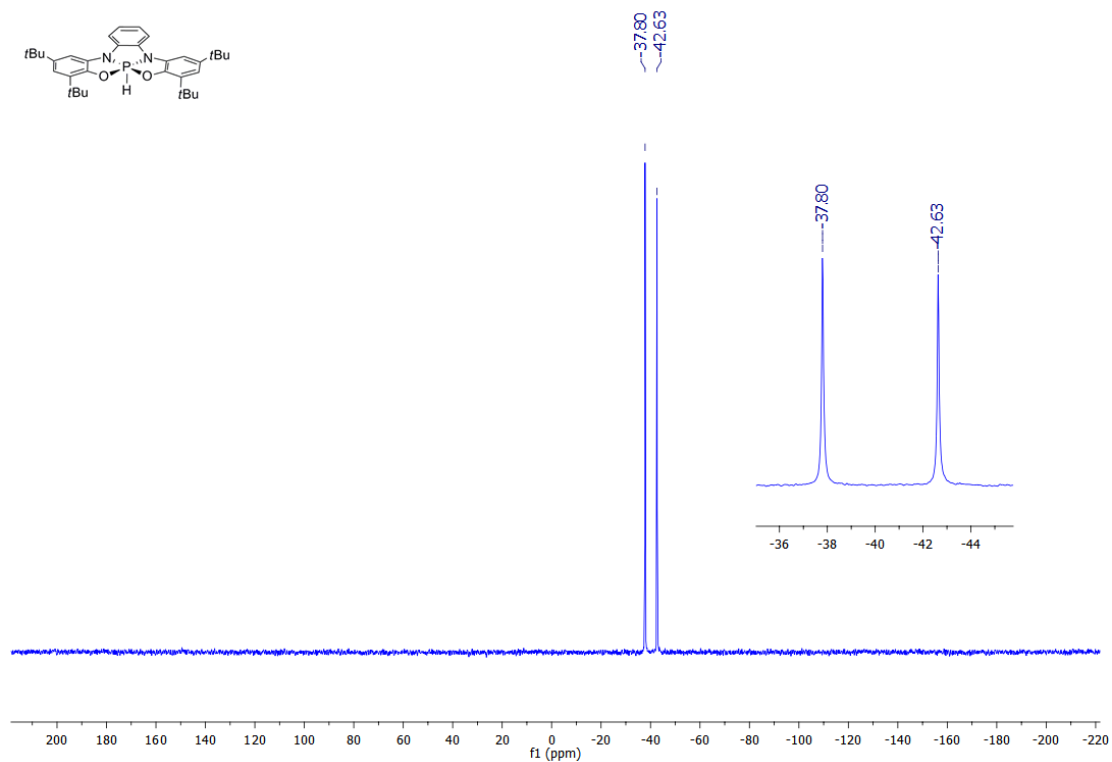

**Figure S2.**  $^{31}\text{P}$  NMR spectrum (162 MHz,  $\text{CDCl}_3$ ) of **1-H**.

# SUPPORTING INFORMATION

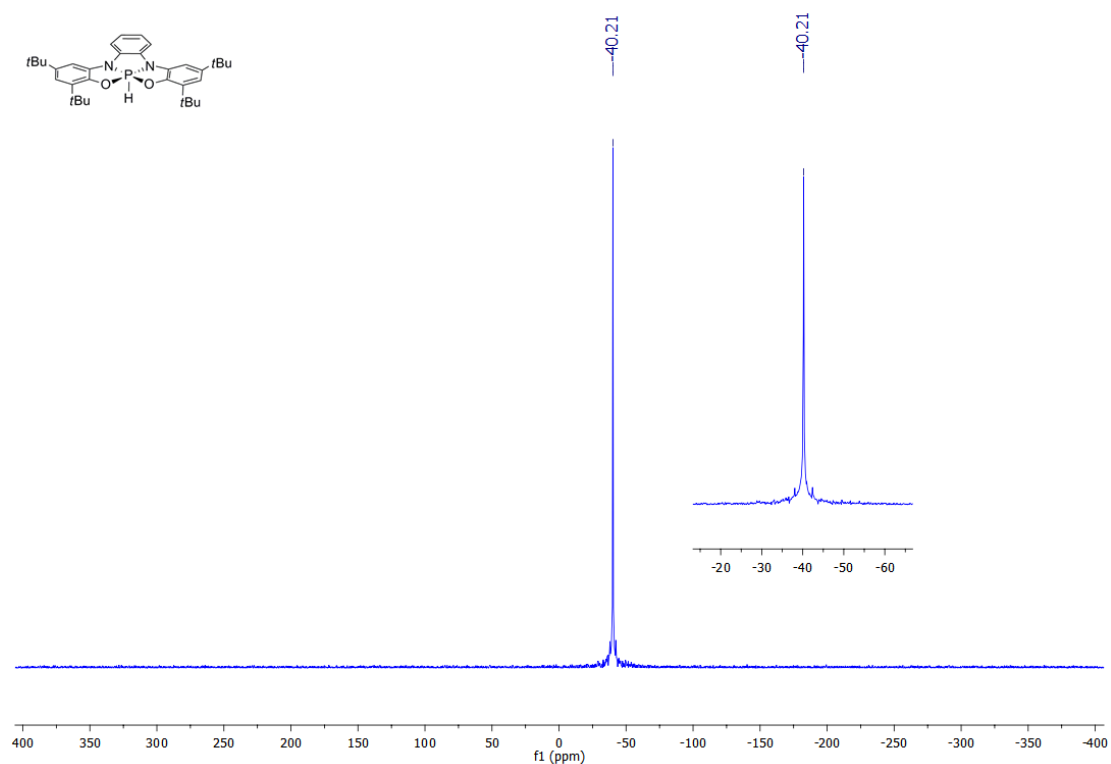

**Figure S3.**  $^{31}\text{P}\{^1\text{H}\}$  NMR spectrum (162 MHz,  $\text{CDCl}_3$ ) of **1-H**.

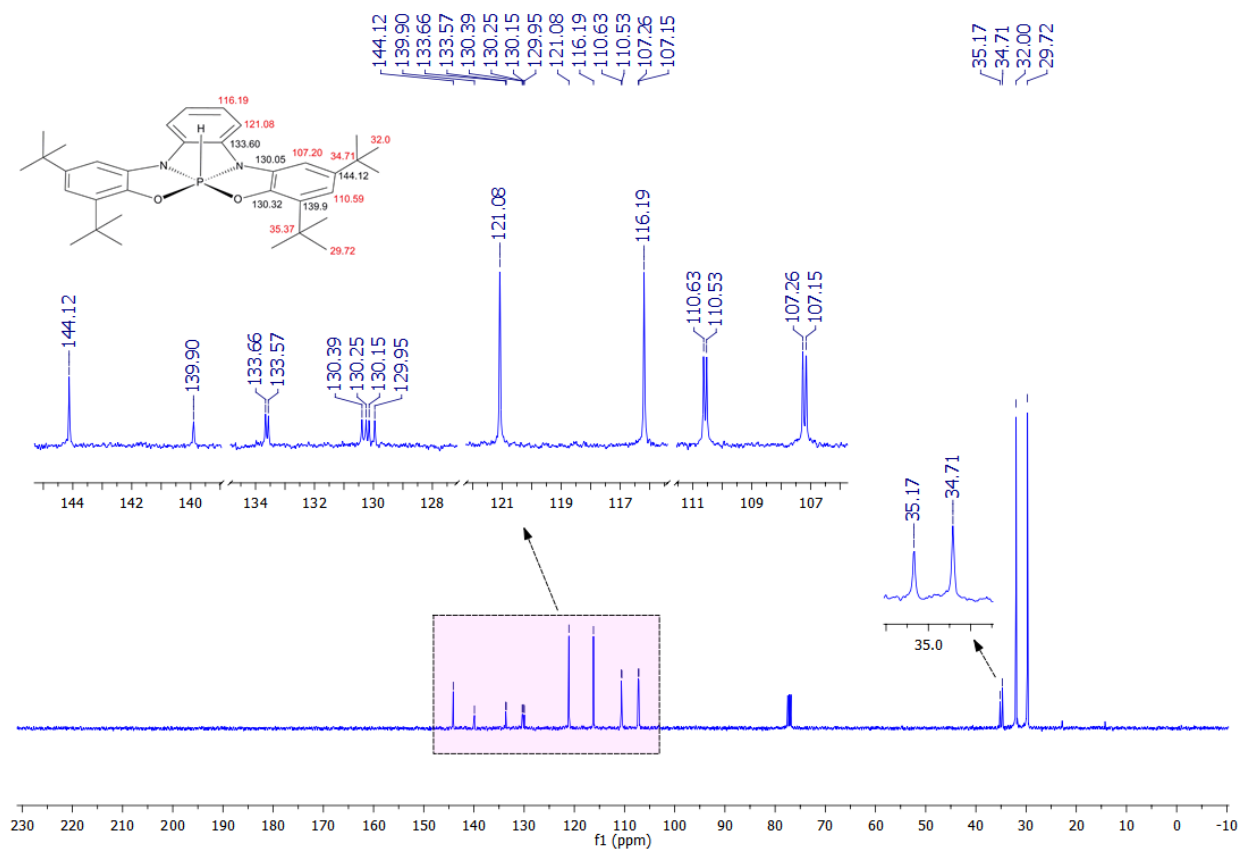

**Figure S4.**  $^{13}\text{C}$  NMR spectrum (100 MHz,  $\text{CDCl}_3$ ) of **1-H**.

## SUPPORTING INFORMATION

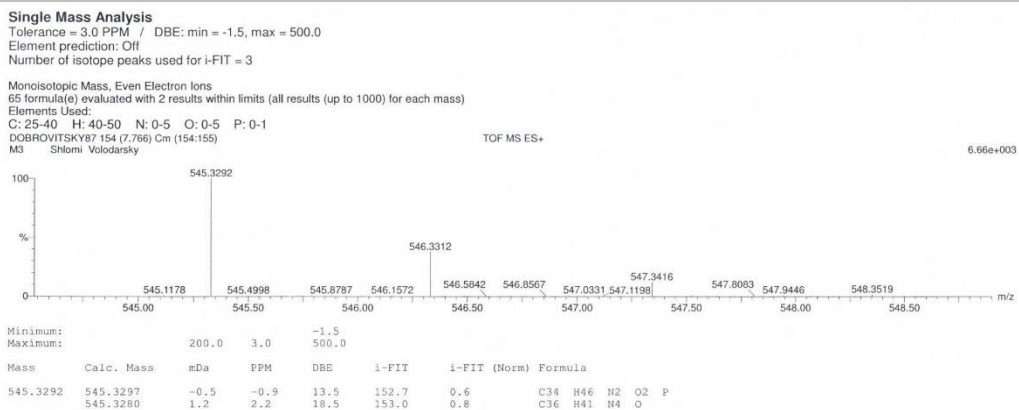

**Figure S5.** HRMS spectrum of **1-H**.

### Synthesis of $[1^-][K(18\text{-crown-6})]$ :

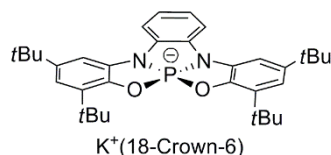

KHMDS (0.192 g, 0.964 mmol) was added to a 10 mL of  $Et_2O$  solution of compound **1-H** (0.5 g, 0.918 mmol) at room temperature. An instant reaction was observed (the reaction in toluene showed the formation of **3** by  $^{31}P$  NMR spectrum (120.00 ppm). 18-Crown-6 (0.243 g, 0.918 mmol) was added (**Note:** complete evaporation of  $Et_2O$  showed decomposition). The slow evaporation of this solution at room temperature afforded colorless crystals of  $[1^-][K(18\text{-crown-6})]$  after one week. Yield: 0.3 g (38.6%).  $^1H$  NMR (400 MHz, in  $d_8\text{-THF}$ );  $\delta$  = 7.16 (m, 2H, Ar-H), 7.11 (s, 2H, Ar-H), 6.60 (s, 4H, Ar-H), 3.29 (s, 24H,  $-CH_2\text{-crown ether}$ ), 1.43 (s, 18H,  $-C(CH_3)_3$ ), 1.31 (s, 18H,  $-C(CH_3)_3$ ) ppm.  $^{13}C$  NMR (100 MHz, in  $d_8\text{-THF}$ );  $\delta$  = 147.89 (d,  $J$  = 10 Hz), 139.55 (d,  $J$  = 5 Hz), 138.70, 137.66 (d,  $J$  = 2 Hz), 131.20, 118.50, 112.94, 112.57, 107.13, 71.05 ( $-CH_2\text{-crown ether}$ ), 35.29 ( $-C(CH_3)_3$ ), 32.78 ( $-C(CH_3)_3$ ), 30.48 ( $-C(CH_3)_3$ ) ppm.  $^{31}P$  NMR (162 MHz, in  $d_8\text{-THF}$ );  $\delta$  = 74.40 ppm.

**In situ formation of  $1^-$  in DME:** KHMDS (0.192 g, 0.964 mmol) was added to 8 mL DME solution of compound **1-H** (0.5 g, 0.918 mmol) at room temperature. An instant reaction was observed that showed the formation of  $1^-$  by multinuclear NMR.

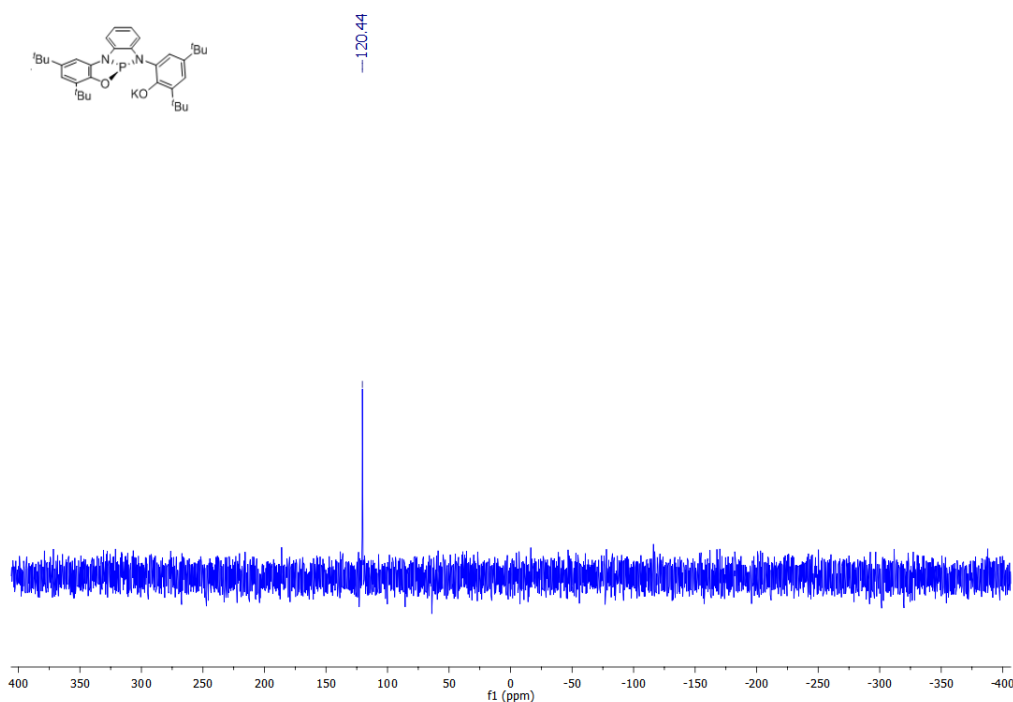

**Figure S6.** In-situ  $^{31}P$  NMR spectrum (162 MHz, in toluene) of **3**.

# SUPPORTING INFORMATION

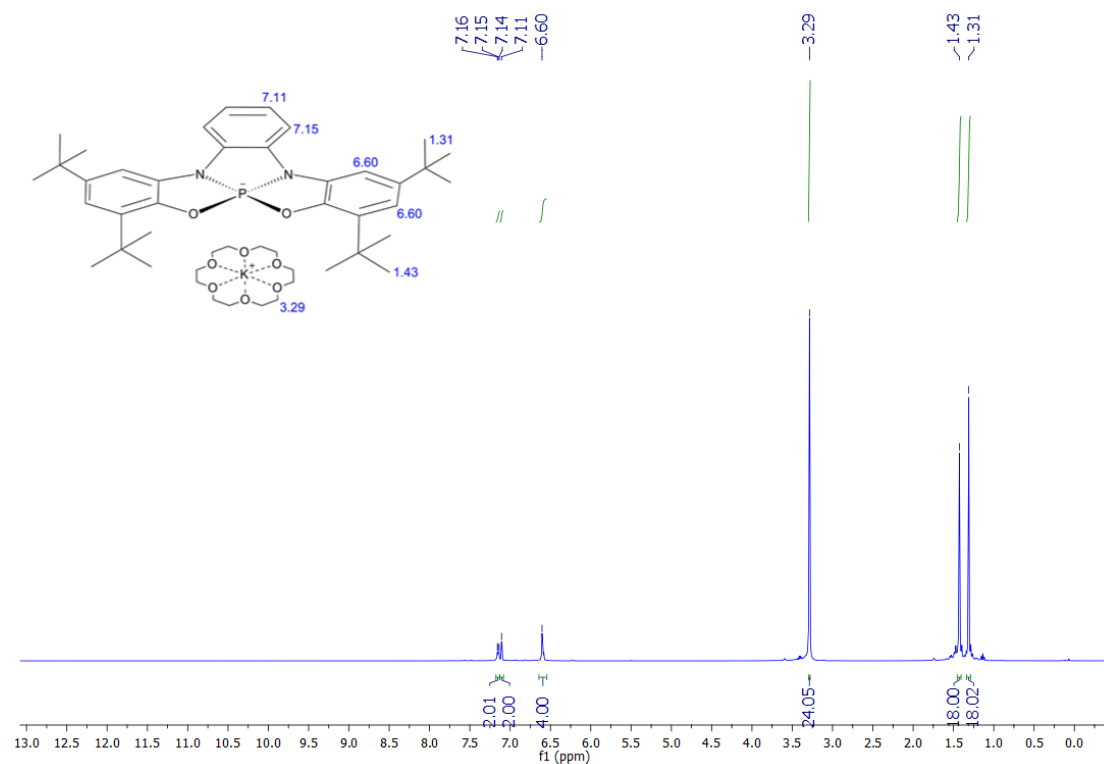

**Figure S7.**  $^1\text{H}$  NMR spectrum (400 MHz,  $d_8$ -THF) of  $[1][\text{K}(18\text{-crown-6})]$ .

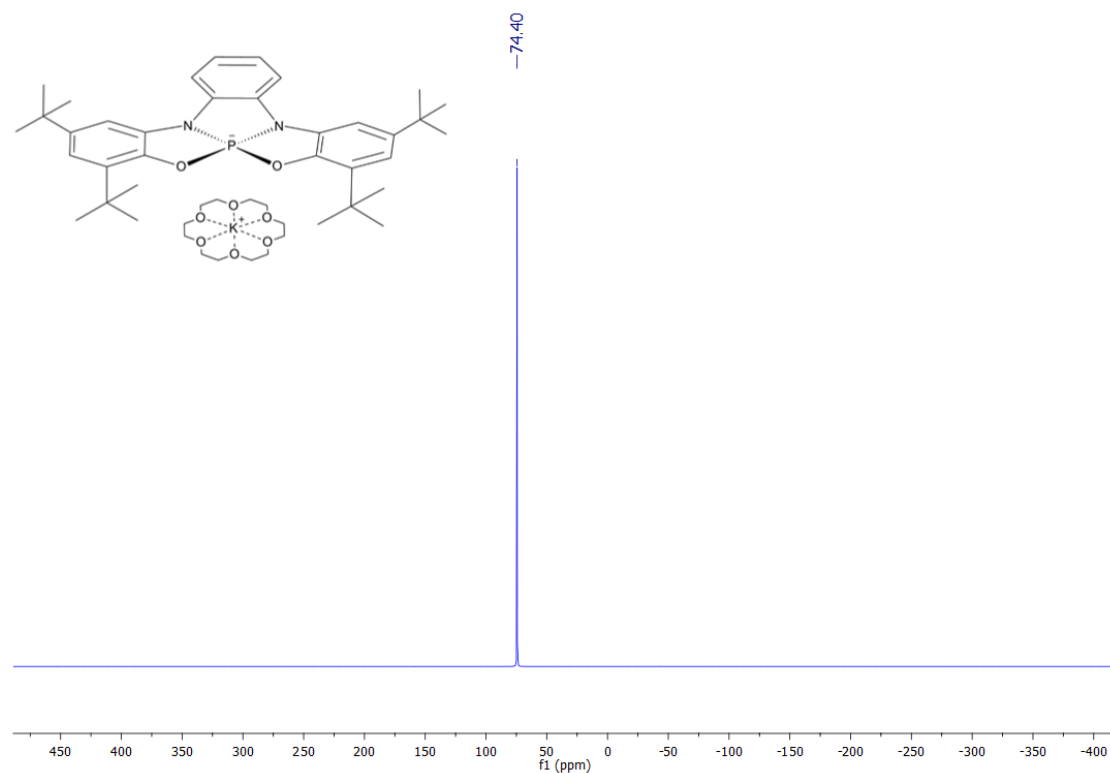

**Figure S8.**  $^{31}\text{P}$  NMR spectrum (162 MHz,  $d_8$ -THF) of  $[1][\text{K}(18\text{-crown-6})]$ .

## SUPPORTING INFORMATION

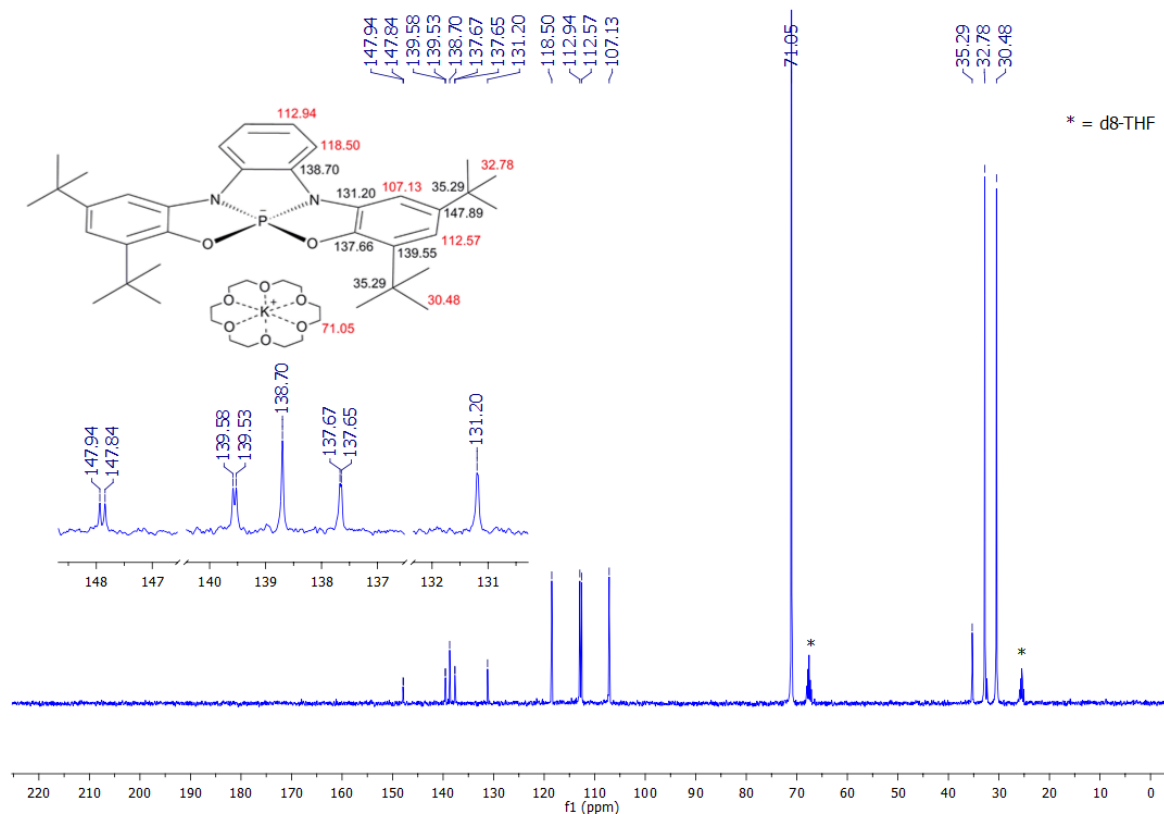

**Figure S9.**  $^{13}\text{C}$  NMR spectrum (100 MHz, d8-THF) of  $[1^-][\text{K}(18\text{-crown-6})]$ .

### Synthesis of 1-1:

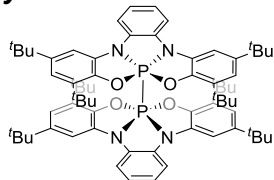

$[1^-][\text{K}(18\text{-crown-6})]$  (0.333 g, 0.394 mmol) was added to a 10 mL  $\text{Et}_2\text{O}$  solution of Iodine (100 mg, 0.394 mmol) at room temperature. An instant reaction was observed. The solution was filtered and all the volatiles were evaporated under vacuum (to remove iodine the compound was also heated to 80 °C). The obtained solid was dissolved in hexane (4 mL) and few drops of acetonitrile were added. Slow evaporation of this solution at room temperature afforded

colorless crystals after two weeks. Yield: 0.12 g (56.0%).

**Alternative path:** Similar results were also obtained on performing the reaction in DME solution, through in situ generation of  $1^-$  using KHMDS and without 18-crown-6. Yield: 0.13 g (65.12%).  $^1\text{H}$  NMR (400 MHz,  $\text{CDCl}_3$ , at -40 °C);  $\delta$  = 7.57 (s, 2H, Ar-H), 7.21 (s, 2H, Ar-H), 6.91 (s, 4H, Ar-H), 6.83 (s, 2H, Ar-H), 6.68 (s, 4H, Ar-H), 6.59 (s, 2H, Ar-H), 1.43 (s, 18H,  $-\text{C}(\text{CH}_3)_3$ ), 1.33 (s, 18H,  $-\text{C}(\text{CH}_3)_3$ ), 1.21 (s, 18H,  $-\text{C}(\text{CH}_3)_3$ ), 0.87 (s, 18H,  $-\text{C}(\text{CH}_3)_3$ ) ppm.  $^{13}\text{C}$  NMR (100 MHz,  $\text{CDCl}_3$ , at -40 °C);  $\delta$  = 142.87, 141.70, 139.75 (d,  $J$  = 13 Hz), 132.64, 132.22, 129.72 (d,  $J$  = 13 Hz), 128.80 (d,  $J$  = 18 Hz), 120.39, 119.59, 116.01, 115.08, 111.98, 110.73, 107.48, 106.34, 34.88 ( $-\text{C}(\text{CH}_3)_3$ ), 34.78 ( $-\text{C}(\text{CH}_3)_3$ ), 34.44 ( $-\text{C}(\text{CH}_3)_3$ ), 34.00 ( $-\text{C}(\text{CH}_3)_3$ ), 31.90 ( $-\text{C}(\text{CH}_3)_3$ ), 31.81 ( $-\text{C}(\text{CH}_3)_3$ ), 29.69 ( $-\text{C}(\text{CH}_3)_3$ ), 28.91 ( $-\text{C}(\text{CH}_3)_3$ ) ppm.  $^{31}\text{P}$  NMR (162 MHz,  $\text{CDCl}_3$ , at -40 °C);  $\delta$  = -31.70 ppm. **HRMS** ( $\text{AP}^+$ ): Calculated for  $\text{C}_{66}\text{H}_{88}\text{N}_4\text{O}_4\text{P}_2$ : 1087.6359  $[\text{M}+\text{H}]^+$ ; Obs: 1087.6348. **EA:** Calc'd for  $\text{C}_{66}\text{H}_{88}\text{N}_4\text{O}_4\text{P}_2 \cdot (4\text{H}_2\text{O} + 1.5\text{O}_2)$ : C, 67.64; H, 8.01; N, 4.64; Obs: C, 67.11; H, 7.99; N, 4.62. Only partially hydrolyzed and oxidized 1-1 could be obtained after multiple attempts.

**Note:**  $^1\text{H}$  and  $^{13}\text{C}$  NMR spectra of 1-1 at room temperature showed broad merged signals. We believe that the broaden NMR spectra is a result of London dispersion forces between the large substituents at the two P-centers, that preclude free rotation around P-P bond and the rotational vibration affects the NMR spectra. At low temperature we diminish the effect of this vibration and get a better resolved spectra, but it is important to mention that we still get four different t-Bu signals that supports this explanation. A spontaneous dissociation at RT is not observed by EPR.



# SUPPORTING INFORMATION

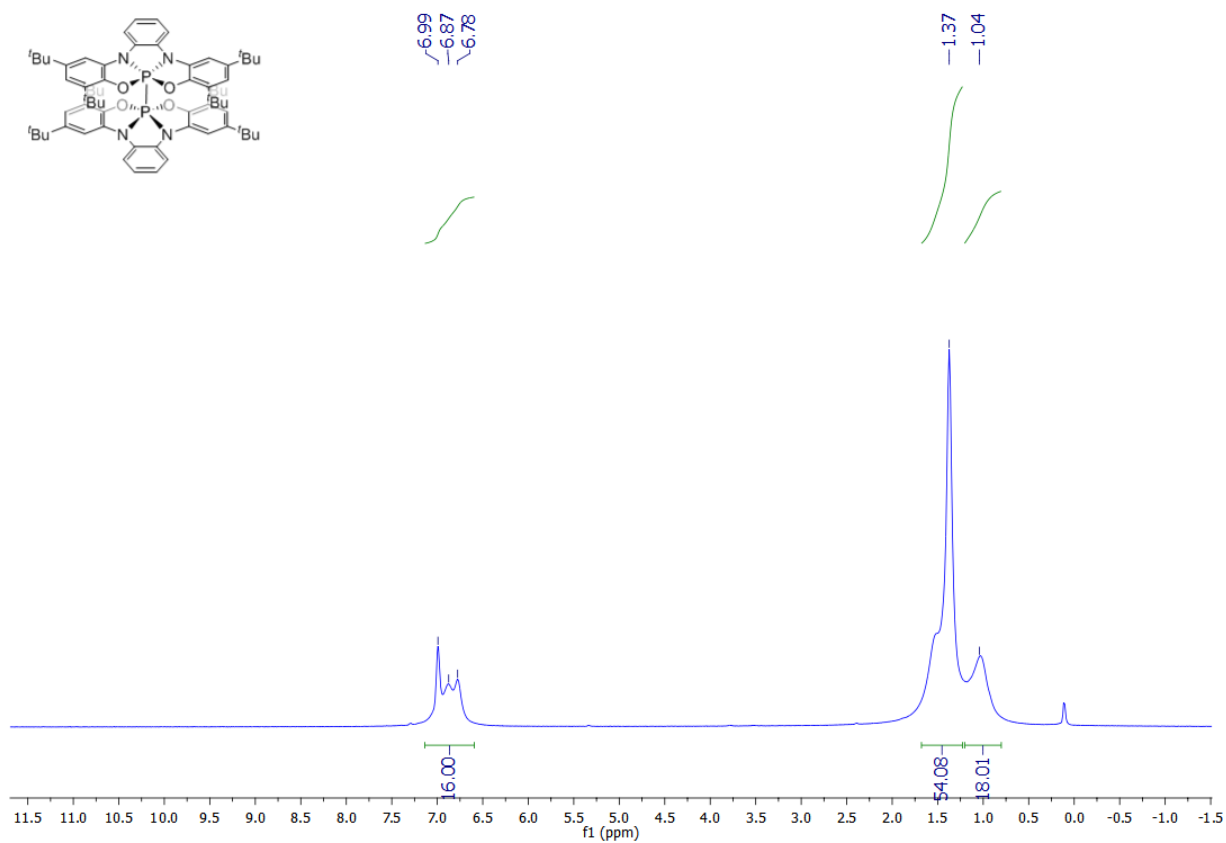

**Figure S10.**  $^1\text{H}$  NMR spectrum (400 MHz,  $\text{CDCl}_3$ ) of 1-1 at room temperature.

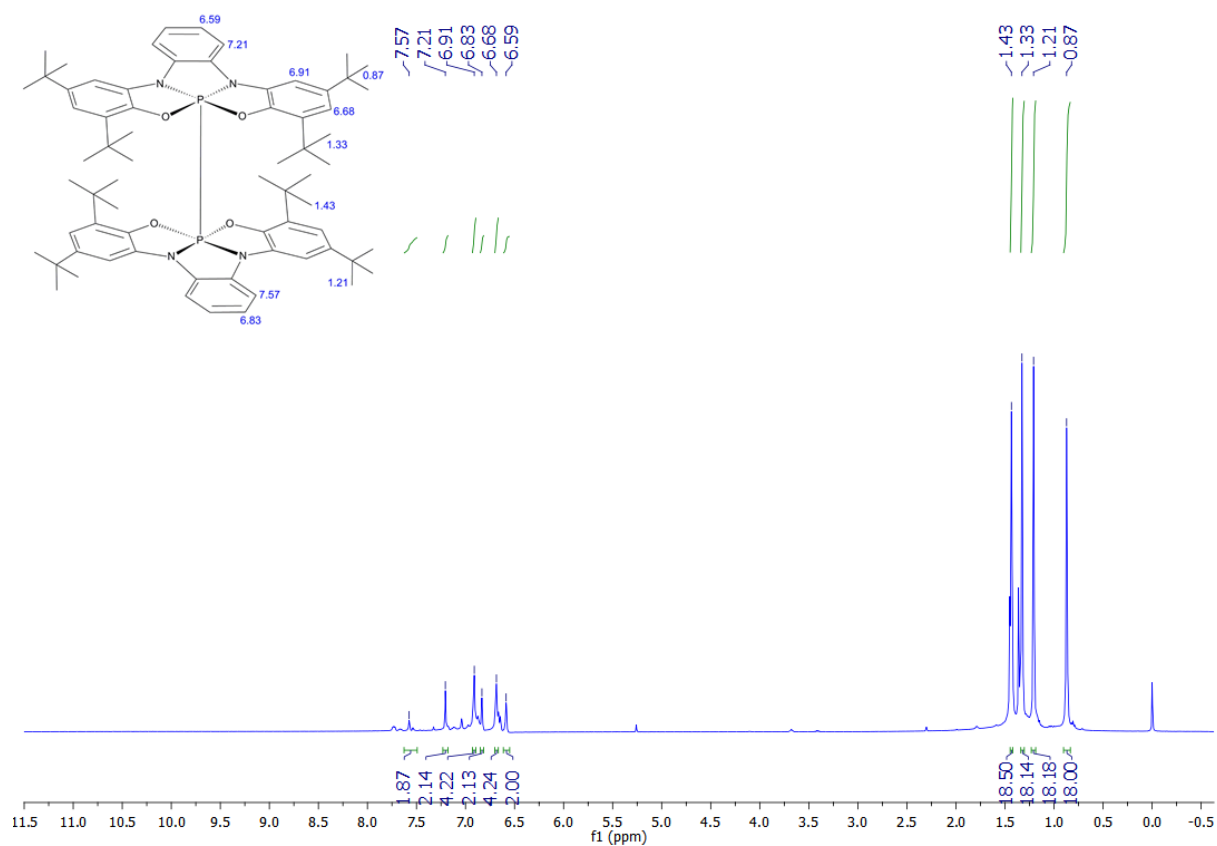

**Figure S11.**  $^1\text{H}$  NMR spectrum (400 MHz,  $\text{CDCl}_3$ ) of 1-1 at  $-40\text{ }^\circ\text{C}$ .

## SUPPORTING INFORMATION

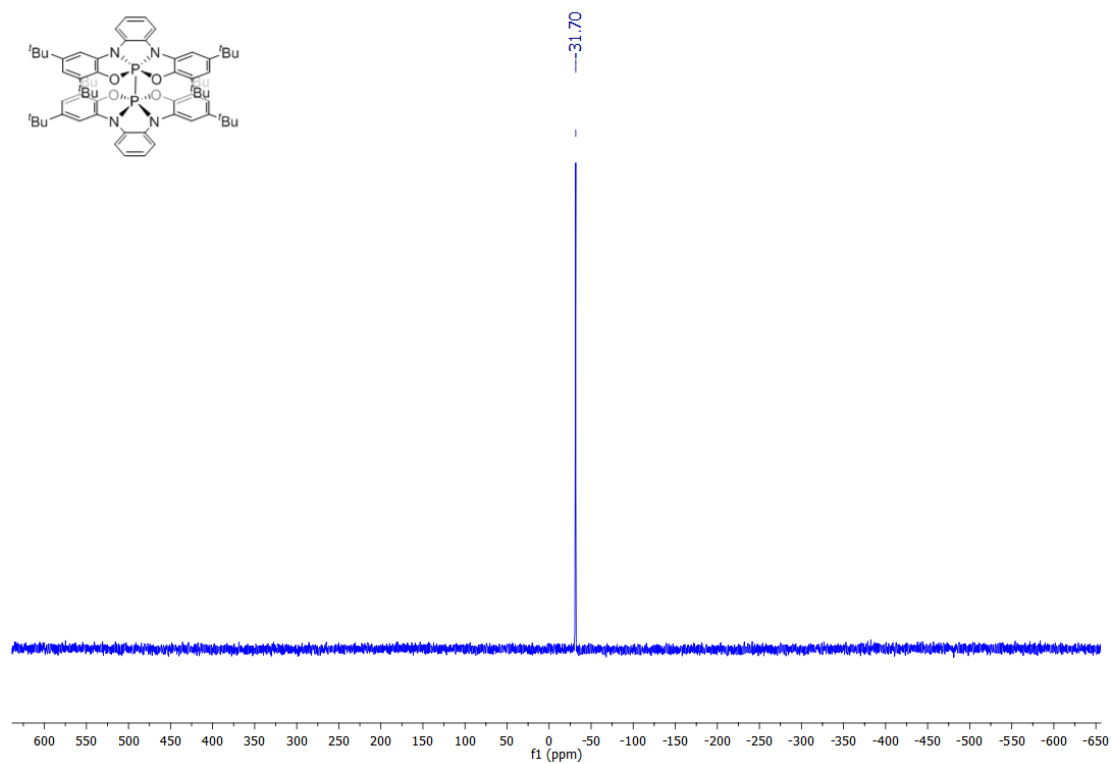

**Figure S12.**  $^{31}\text{P}$  NMR spectrum (162 MHz,  $\text{CDCl}_3$ ) of **1-1**.

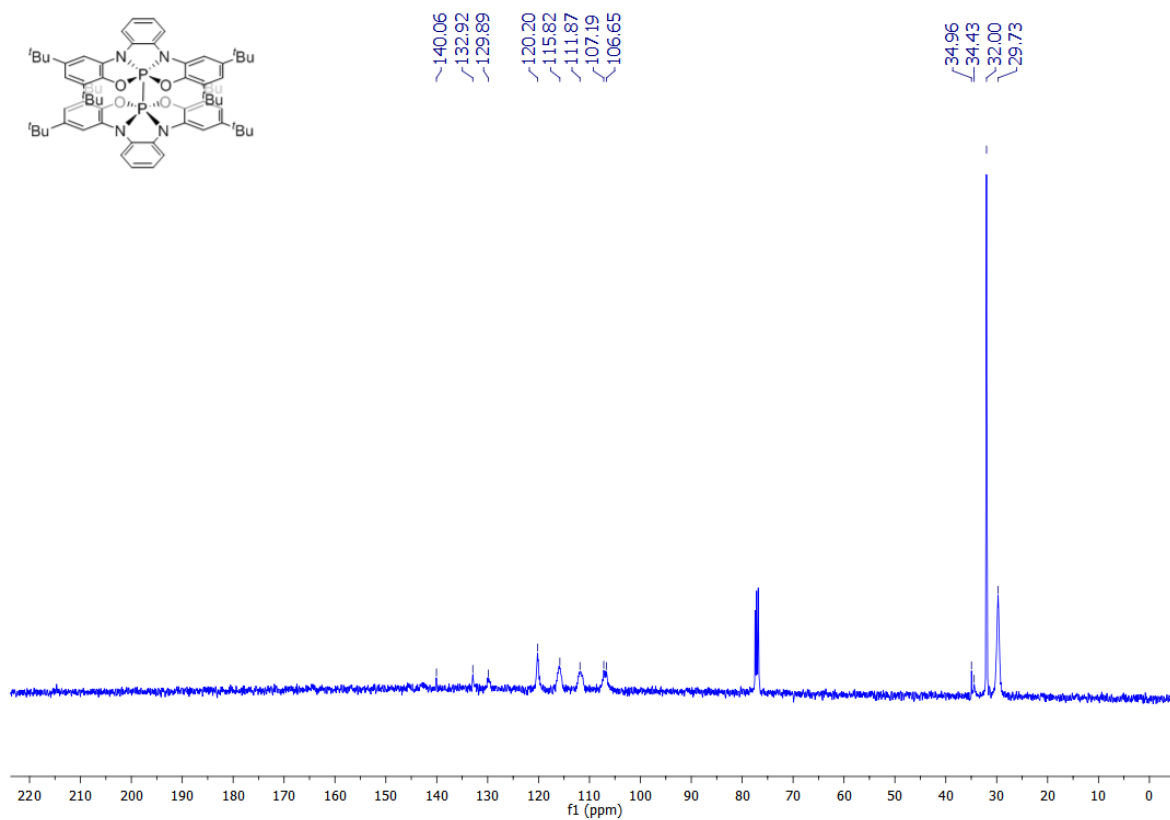

**Figure S13.**  $^{13}\text{C}$  NMR spectrum (100 MHz,  $\text{CDCl}_3$ ) of **1-1** at room temperature.

# SUPPORTING INFORMATION

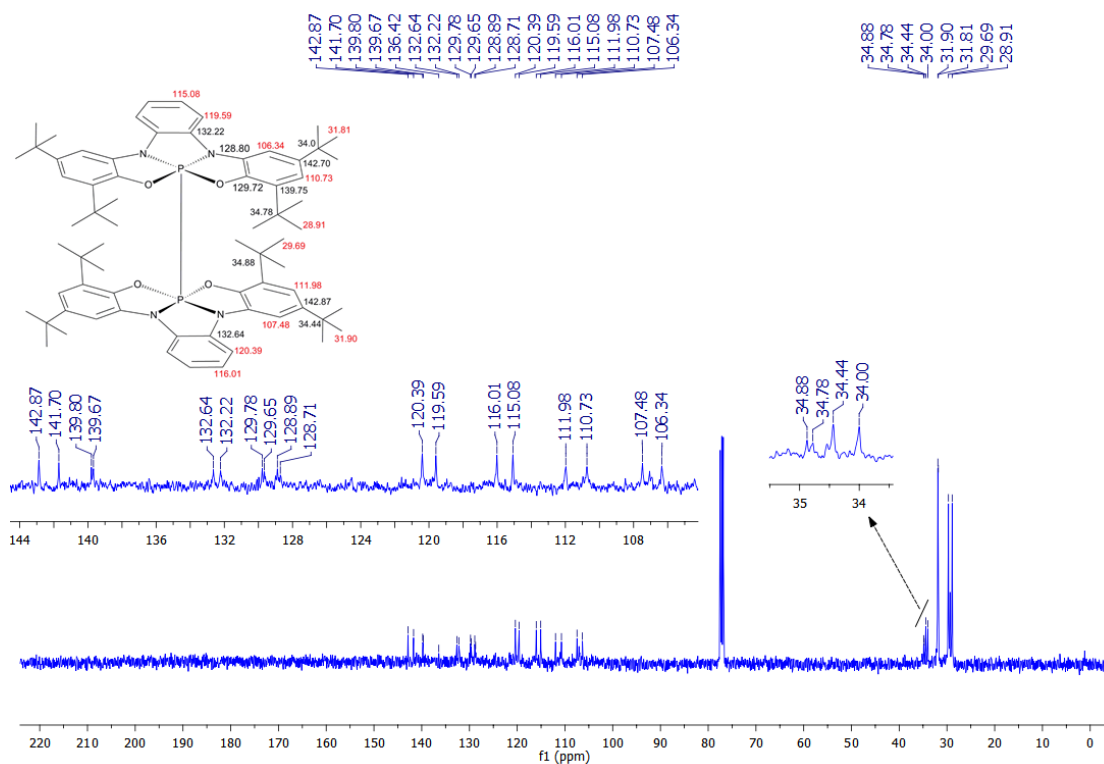

**Figure S14.**  $^{13}\text{C}$  NMR spectrum (100 MHz,  $\text{CDCl}_3$ ) of **1-1** at  $-40^\circ\text{C}$ .

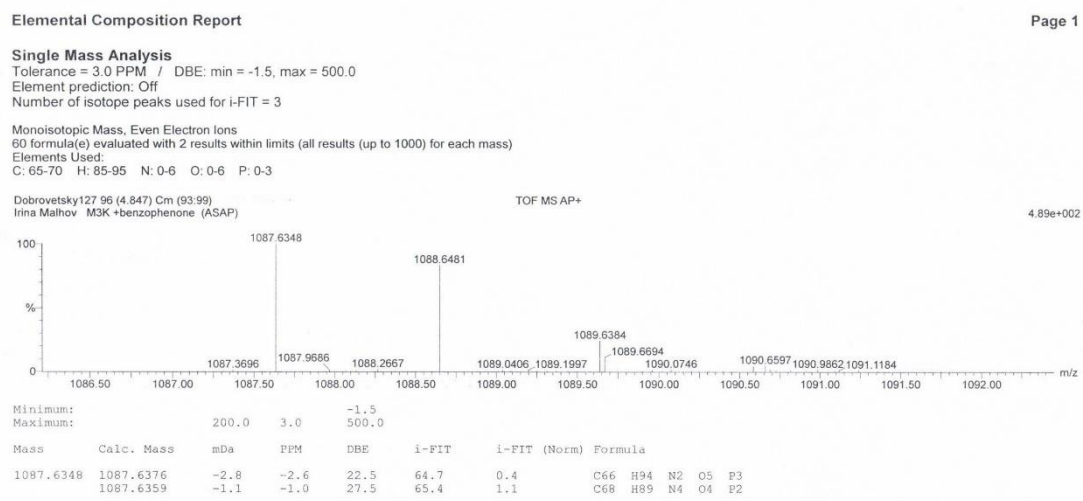

**Figure S15.** HRMS spectrum of **1-1**.

## SUPPORTING INFORMATION

### Synthesis of **4** and **1-O<sup>-</sup>** :

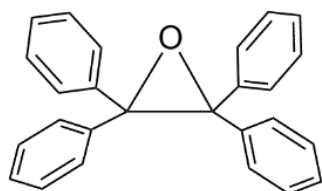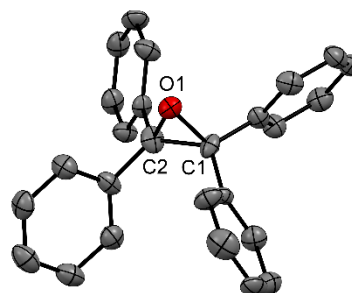

Molecular structure of **4**

[1<sup>-</sup>][K(18-crown-6)] (0.265 g, 0.313 mmol) was added to a 8 mL Et<sub>2</sub>O solution of benzophenone (114 mg, 0.626 mmol) at room temperature. An instant reaction was observed. All the volatiles were evaporated in vacuum. The obtained solid was dissolved in acetonitrile (4 mL) which left to crystallize at -30 °C, after 2 days affording colorless crystals of **4** (yield: 45 mg, 41.3%). The decanted solution was also evaporated and recrystallized in 5 mL hexane solution that on slow evaporation at room temperature after three days afforded colorless crystals of **1-OK** (Yield: 91 mg, 48.6 %).

**Alternative path:** The formation of **4** (yield: 51 mg, 46.9%) and **1-OK** (Yield: 115 mg, 61.5%) could also be observed on performing the reaction in a DME solution, that proceeds through in situ generation of 1<sup>-</sup> using KHMDS and without 18-crown-6. (Note: Crystals of hydrolyzed product, **1-OH** were also obtained during repeated attempts to crystallized **1-OK**)

**4:** <sup>1</sup>H NMR (400 MHz, CDCl<sub>3</sub>); δ = 7.23 (m, 8H, Ar-H), 7.11 (m, 12H, Ar-H) ppm. <sup>13</sup>C NMR (100 MHz, CDCl<sub>3</sub>); δ = 138.76, 128.37, 127.70, 127.20, 74.18 (C-O) ppm. HRMS (ES<sup>+</sup>): Calculated for C<sub>26</sub>H<sub>20</sub>O: 348.1514 [M]<sup>+</sup>; Obs: 348.1516.

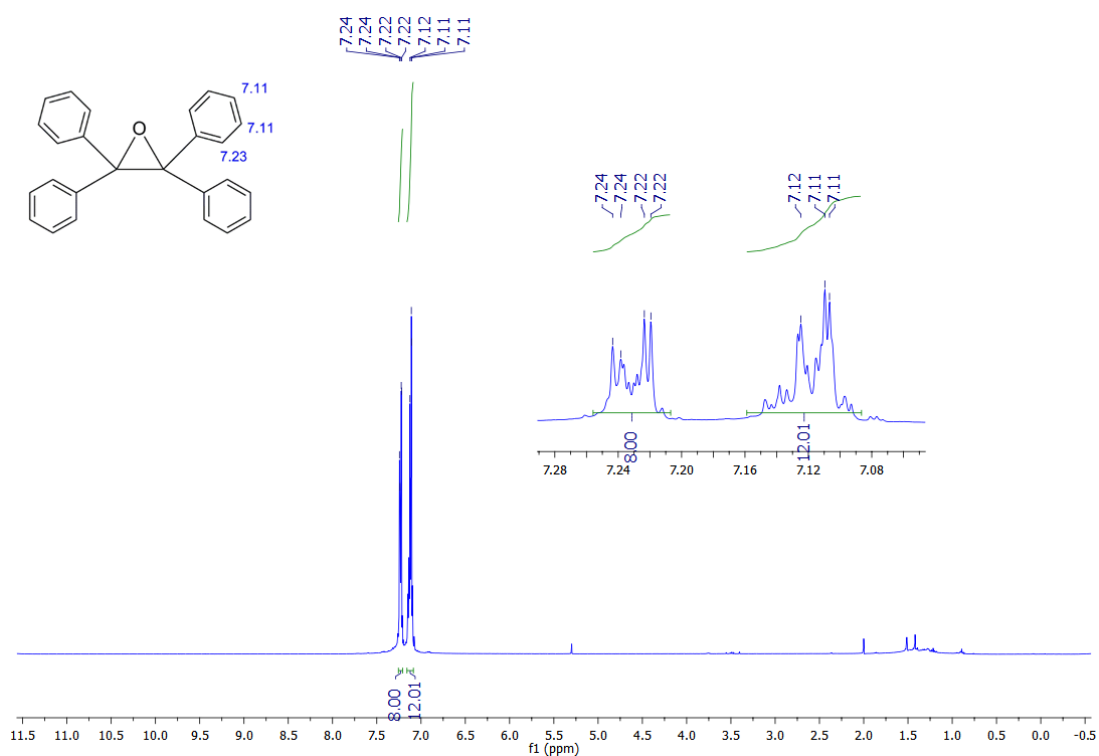

**Figure S16.** <sup>1</sup>H NMR spectrum (400 MHz, CDCl<sub>3</sub>) of **4**.

## SUPPORTING INFORMATION

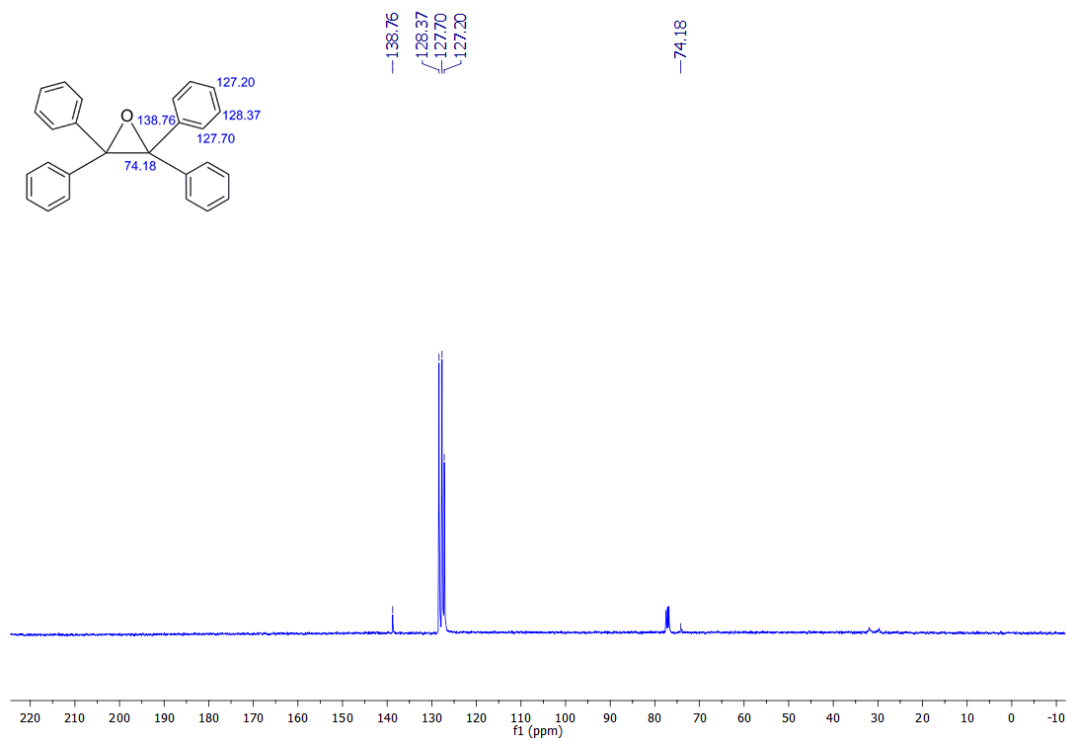

**Figure S17.**  $^{13}\text{C}$  NMR spectrum (400 MHz,  $\text{CDCl}_3$ ) of **4**.

### Elemental Composition Report

#### Single Mass Analysis (displaying only valid results)

Tolerance = 20.0 PPM / DBE: min = -1.5, max = 50.0

Selected filters: None

Monoisotopic Mass, Odd and Even Electron Ions

4 formula(e) evaluated with 1 results within limits (all results (up to 1000) for each mass)

Elements Used:

C: 20-30 H: 15-30 O: 0-2

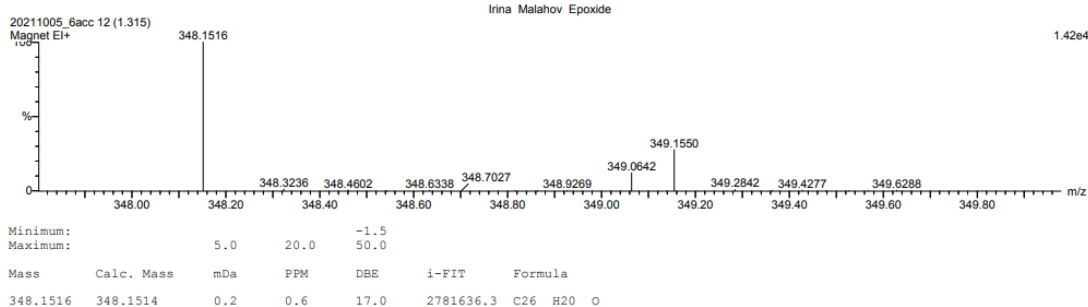

**Figure S18.** HRMS spectrum of **4**.

### 1-OK:

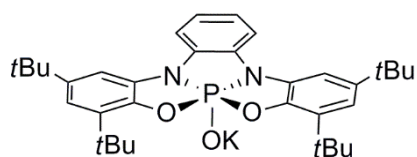

**$^1\text{H}$  NMR (400 MHz,  $d_8$ -toluene);**  $\delta$  = 7.46 (s, 2H, Ar-*H*), 7.21 (s, 2H, Ar-*H*), 7.04 (s, 2H, Ar-*H*), 6.78 (s, 2H, Ar-*H*), 1.53 (s, 18H,  $-\text{C}(\text{CH}_3)_3$ ), 1.36 (s, 18H,  $-\text{C}(\text{CH}_3)_3$ ) ppm.  **$^{13}\text{C}$  NMR (100 MHz,  $d_8$ -toluene);**  $\delta$  = 142.78, 140.09, 132.37 (d,  $J$  = 9 Hz), 131.68 (d,  $J$  = 19 Hz), 120.69, 114.59, 112.78 (d,  $J$  = 10 Hz), 104.24 (d,  $J$  = 10 Hz), 104.82 (d,  $J$  = 10 Hz), 35.15 ( $-\text{C}(\text{CH}_3)_3$ ), 34.52 ( $-\text{C}(\text{CH}_3)_3$ ), 32.31 ( $-\text{C}(\text{CH}_3)_3$ ), 29.84 ( $-\text{C}(\text{CH}_3)_3$ ) ppm.  **$^{31}\text{P}$  NMR (162 MHz,  $d_8$ -toluene);**  $\delta$  = -28.21 ppm. **EA:** Calc'd for  $\text{C}_{34}\text{H}_{44}\text{KN}_2\text{O}_3\text{P} \cdot (3\text{H}_2\text{O} + \text{O})$ : C, 61.06; H, 7.54; N, 4.19; Obs: C, 61.04; H, 7.56; N, 4.21. Only partially hydrolyzed **1-OK** could be obtained after multiple attempts.

# SUPPORTING INFORMATION

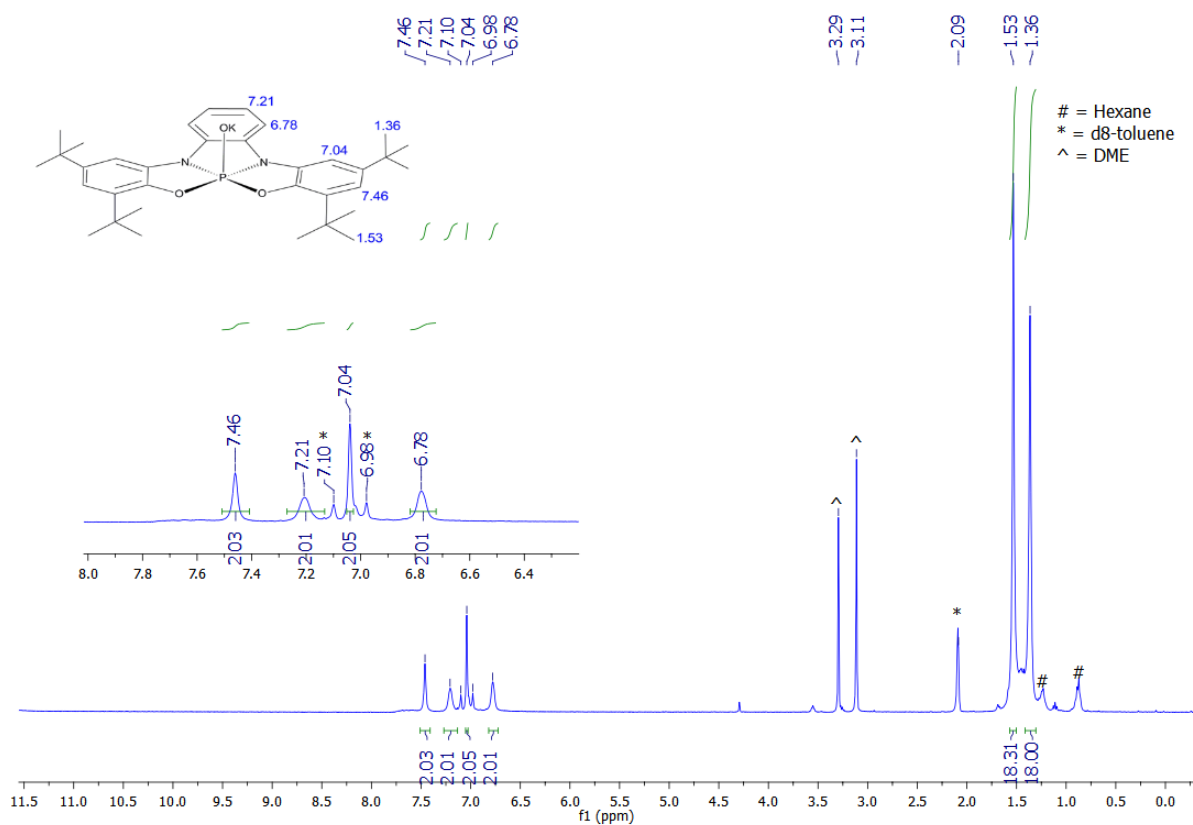

**Figure S19.**  $^1\text{H}$  NMR spectrum (400 MHz, d8-toluene) of 1-OK.

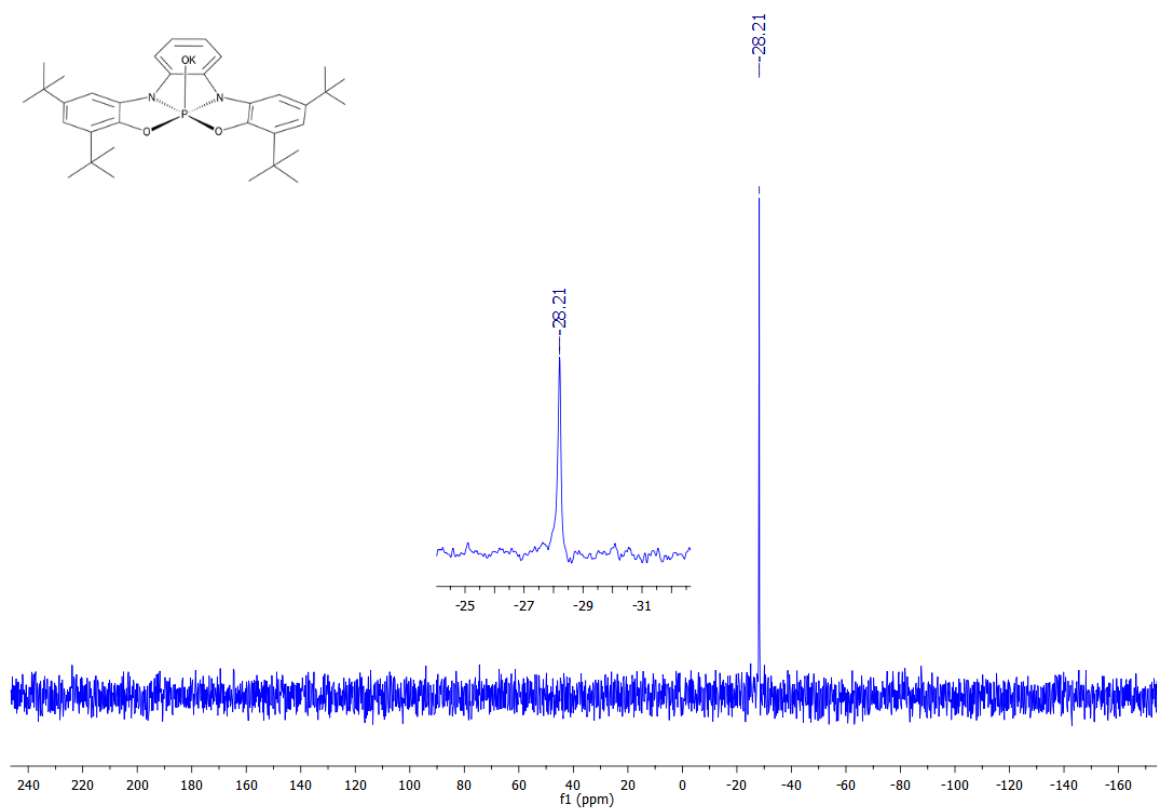

**Figure S20.**  $^{31}\text{P}$  NMR spectrum (162 MHz, d8-toluene) of 1-OK.

## SUPPORTING INFORMATION

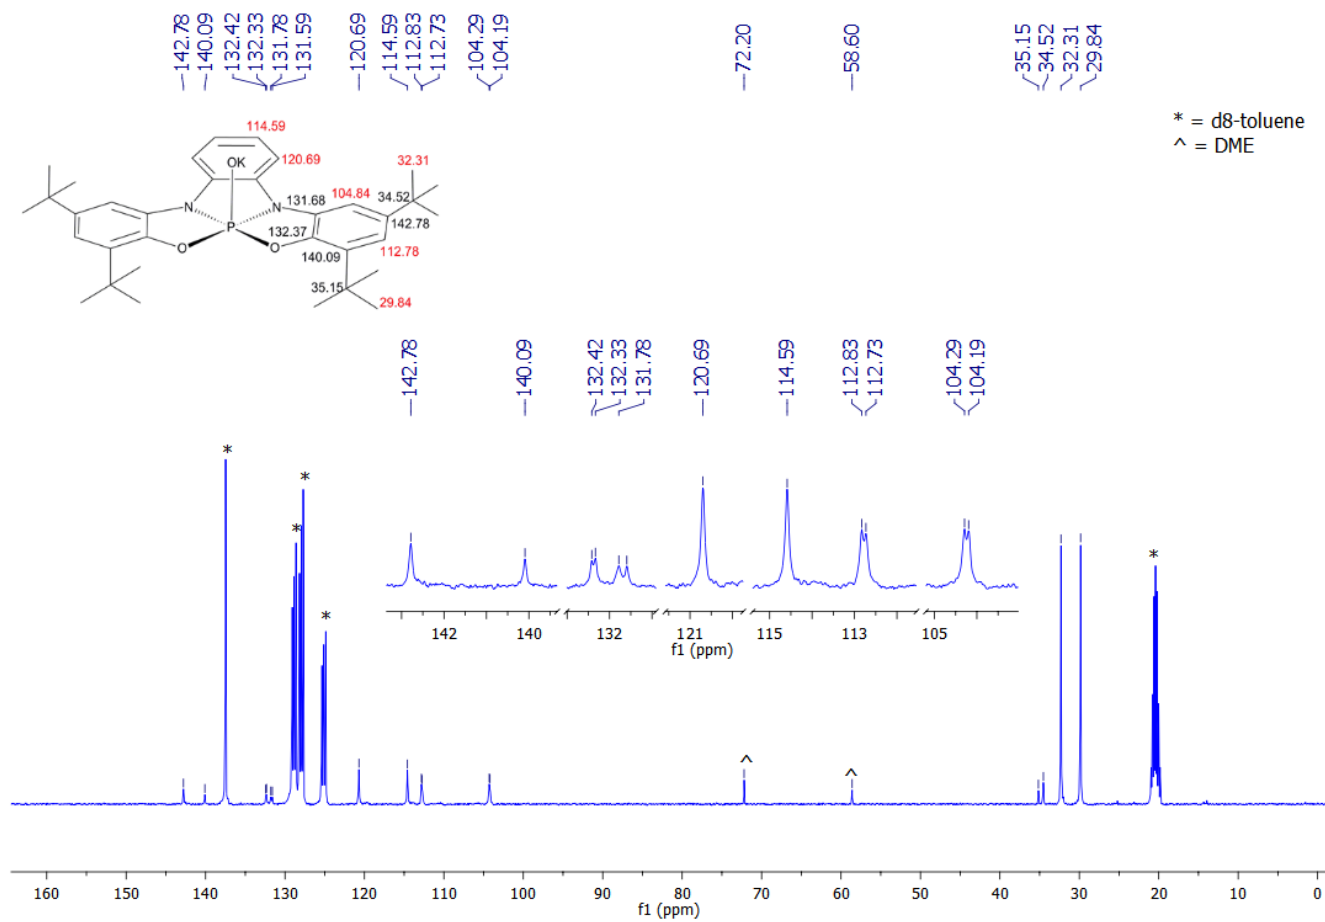

**Figure S21.**  $^{13}\text{C}$  NMR spectrum (100 MHz, d8-toluene) of **1-OK**.

### **1-OH:**

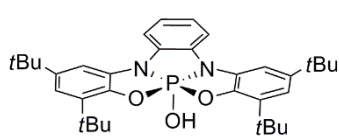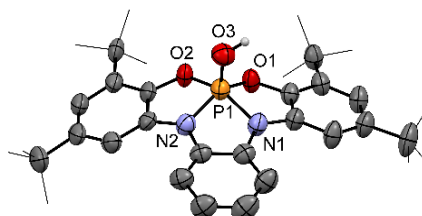

Molecular structure of **1-OH**

Yield: 130 mg (74.3%).  $^1\text{H}$  NMR (400 MHz,  $\text{CDCl}_3$ );  $\delta$  = 7.24 (m, 3H, Ar-H), 7.14 (m, 1H, Ar-H), 6.98 (br, 1H, Ar-H), 6.86 (br, 2H, Ar-H), 6.69 (s, 1H, Ar-H), 1.45 (s, 18H,  $-\text{C}(\text{CH}_3)_3$ ), 1.20 (s, 18H,  $-\text{C}(\text{CH}_3)_3$ ) ppm.  $^{13}\text{C}$  NMR (100 MHz,  $\text{CDCl}_3$ );  $\delta$  = 142.48, 139.47, 132.05, 131.05 (d,  $J$  = 18 Hz), 129.02 (d,  $J$  = 14 Hz), 128.36, 127.69, 127.19, 120.25, 114.25, 112.42, 103.56, 35.01 ( $-\text{C}(\text{CH}_3)_3$ ), 34.22 ( $-\text{C}(\text{CH}_3)_3$ ), 32.19 ( $-\text{C}(\text{CH}_3)_3$ ), 29.53 ( $-\text{C}(\text{CH}_3)_3$ ) ppm.  $^{31}\text{P}$  NMR (162 MHz,  $\text{CDCl}_3$ );  $\delta$  = -28.22 ppm. HRMS (AP $^+$ ): Calculated for  $\text{C}_{34}\text{H}_{46}\text{N}_2\text{O}_3\text{P}$ : 561.3246 [M+H] $^+$ ; Obs: 561.3242. EA: Due to low reproducibility of this compound good EA was not obtained.

# SUPPORTING INFORMATION

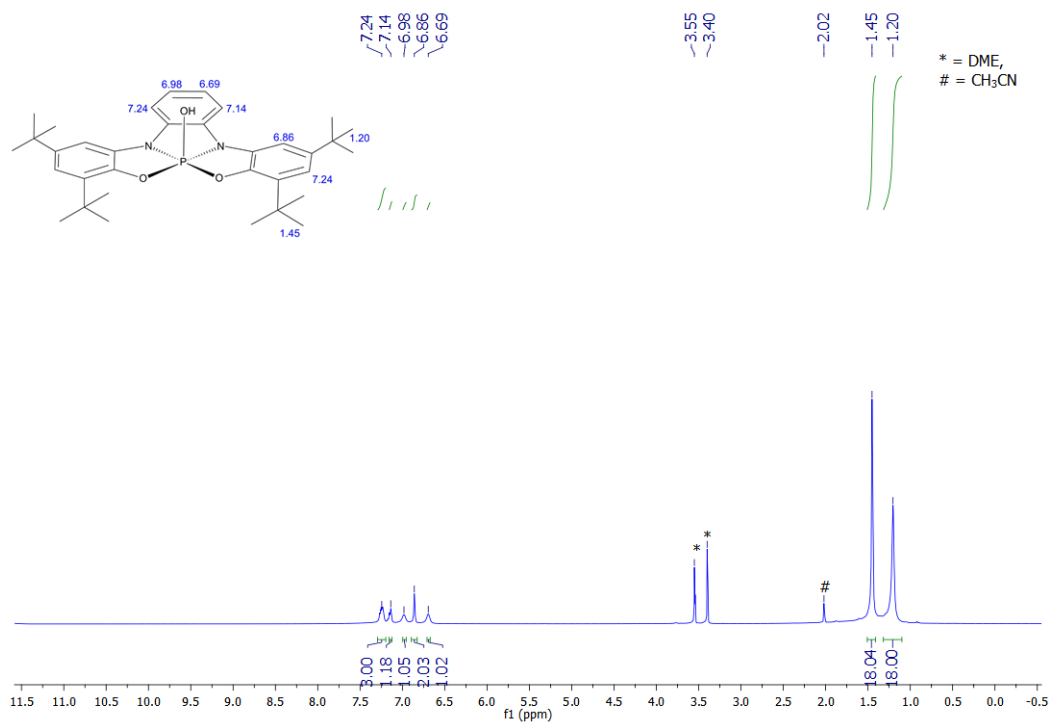

**Figure S22.** <sup>1</sup>H NMR spectrum (400 MHz, CDCl<sub>3</sub>) of 1-OH.

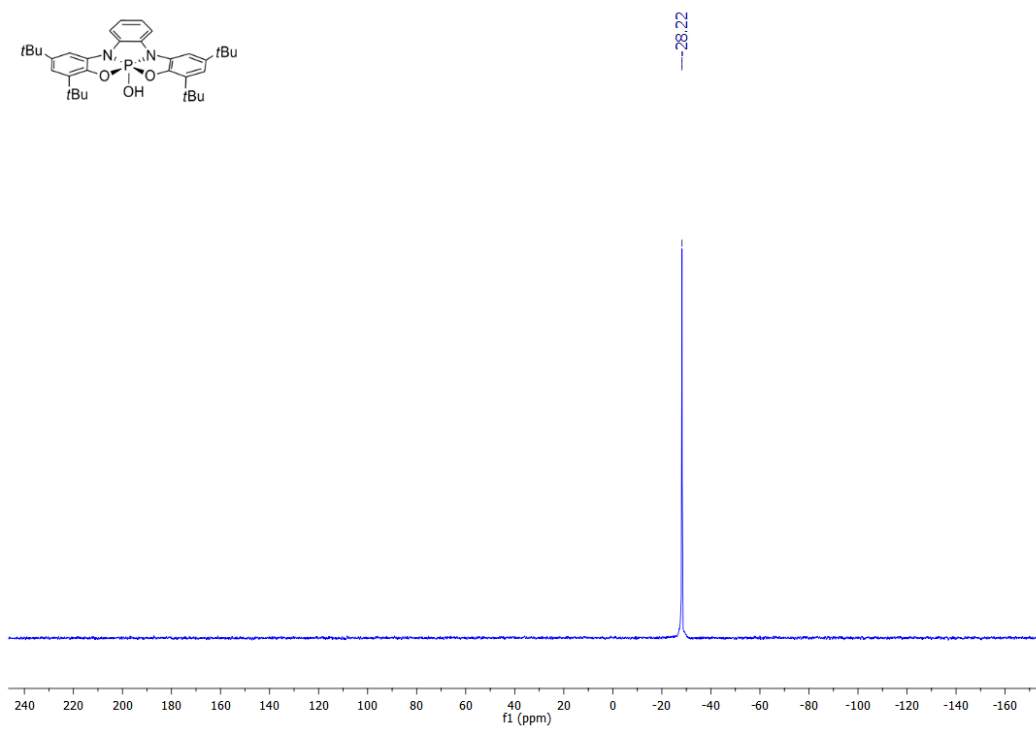

**Figure S23.** <sup>31</sup>P NMR spectrum (162 MHz, CDCl<sub>3</sub>) of 1-OH.



## SUPPORTING INFORMATION

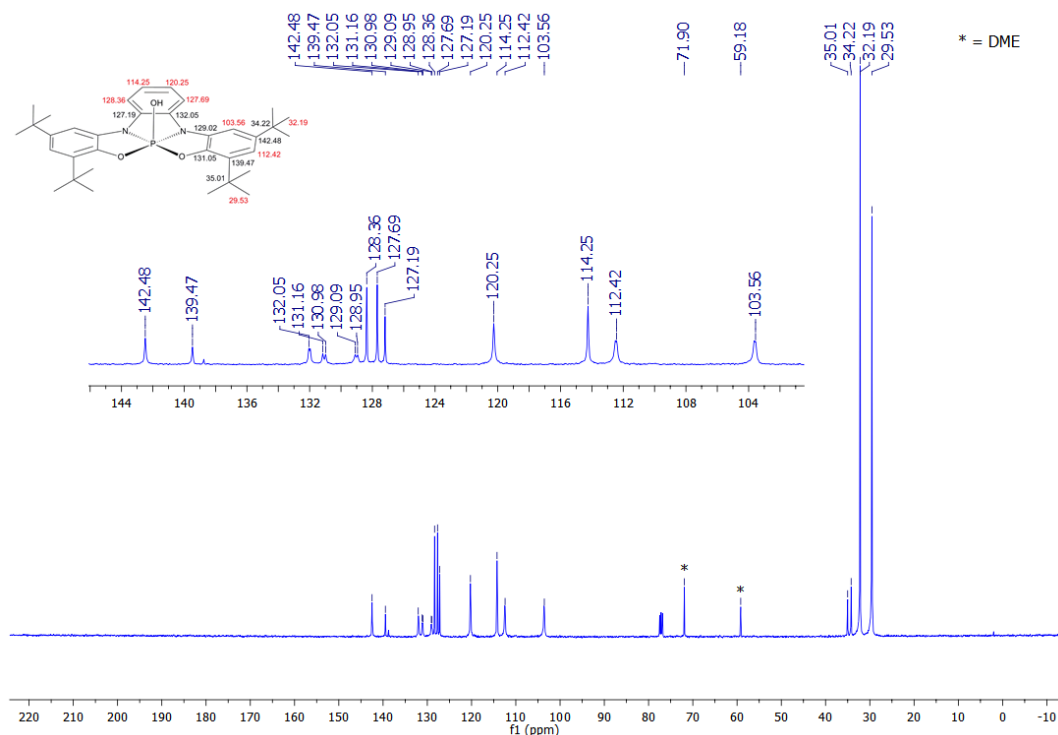

**Figure S24.**  $^{13}\text{C}$  NMR spectrum (100 MHz,  $\text{CDCl}_3$ ) of **1-OH**.

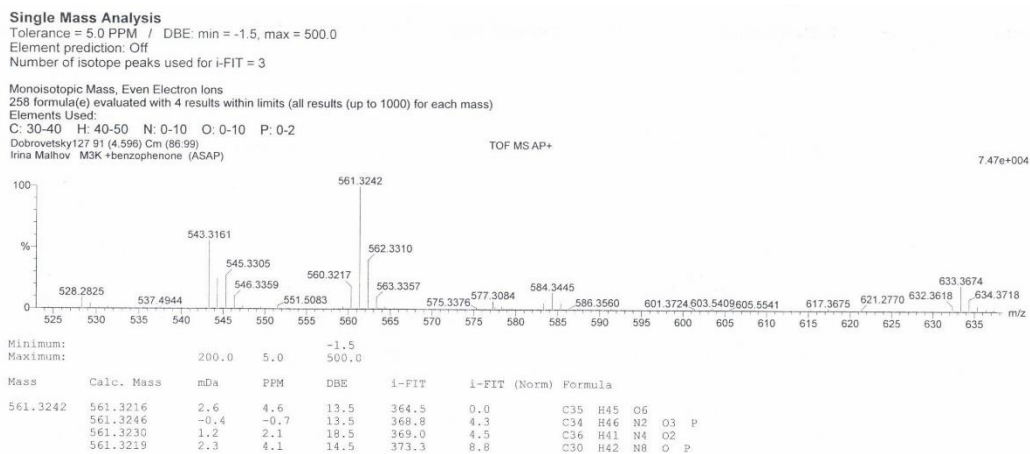

**Figure S25.** HRMS spectrum of **1-OH**.

### Synthesis of **1-Me**:

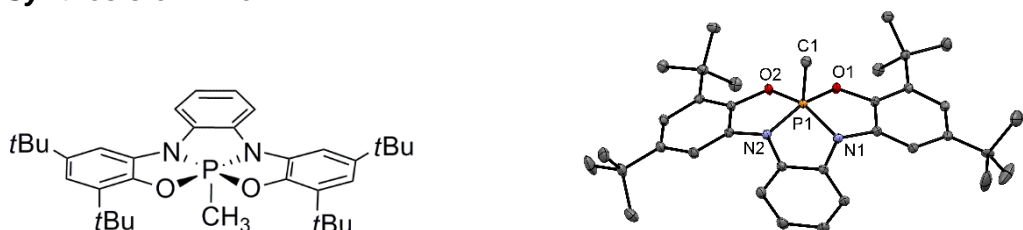

Molecular structure of **4**

## SUPPORTING INFORMATION

Methyl iodide (22  $\mu$ L, 0.353 mmol) was added to a 10 mL Et<sub>2</sub>O solution of [1<sup>-</sup>][K(18-crown-6)] (0.280 g, 0.330 mmol) at -30 °C. The reaction was stirred for 1h. The solution was filtered and all the volatiles were evaporated under vacuum. The obtained solid was dissolved in hexane kept for crystallization at room temperature after 2 weeks affording colorless crystals. Yield: 100 mg (54.25%).

**Alternative path:** The formation of **1-Me** (yield: 110 mg, 59.58%) could also be observed on performing the reaction in a DME solution through in situ generation of 1<sup>-</sup> using KHMDS and without 18-crown-6.

**<sup>1</sup>H NMR (400 MHz, CDCl<sub>3</sub>);**  $\delta$  = 7.61 (m, 2H, Ar-*H*), 7.52 (s, 2H, Ar-*H*), 7.08 (m, 2H, Ar-*H*), 7.01 (s, 2H, Ar-*H*) 1.50 (s, 18H, -C(CH<sub>3</sub>)<sub>3</sub>), 1.42 (s, 18H, -C(CH<sub>3</sub>)<sub>3</sub>), 0.01 (s, 3H, P-CH<sub>3</sub>) ppm. **<sup>13</sup>C NMR (100 MHz, CDCl<sub>3</sub>);**  $\delta$  = 143.58, 139.35, 133.20 (d, *J* = 9 Hz), 129.99 (d, *J* = 13 Hz), 129.74 (d, *J* = 19 Hz), 120.50, 115.55, 110.16 (d, *J* = 10 Hz), 106.97 (d, *J* = 12 Hz), 35.00 (-C(CH<sub>3</sub>)<sub>3</sub>), 34.51 (-C(CH<sub>3</sub>)<sub>3</sub>), 31.88 (-C(CH<sub>3</sub>)<sub>3</sub>), 29.47 (-C(CH<sub>3</sub>)<sub>3</sub>), 18.47 (d, *J*<sub>C-P</sub> = 274 Hz, P-CH<sub>3</sub>) ppm. **<sup>31</sup>P NMR (162 MHz, CDCl<sub>3</sub>);**  $\delta$  = -18.14 (m) ppm. **HRMS (AP<sup>+</sup>):** Calculated for C<sub>35</sub>H<sub>48</sub>N<sub>2</sub>O<sub>3</sub>P: 559.3453 [M+H]<sup>+</sup>; Obs: 559.3464. **EA:** Calc'd for C<sub>35</sub>H<sub>47</sub>N<sub>2</sub>O<sub>2</sub>P·0.025(CH<sub>3</sub>CN): C, 75.21; H, 8.48; N, 5.07; Obs: C, 75.20; H, 8.46; N, 5.07.

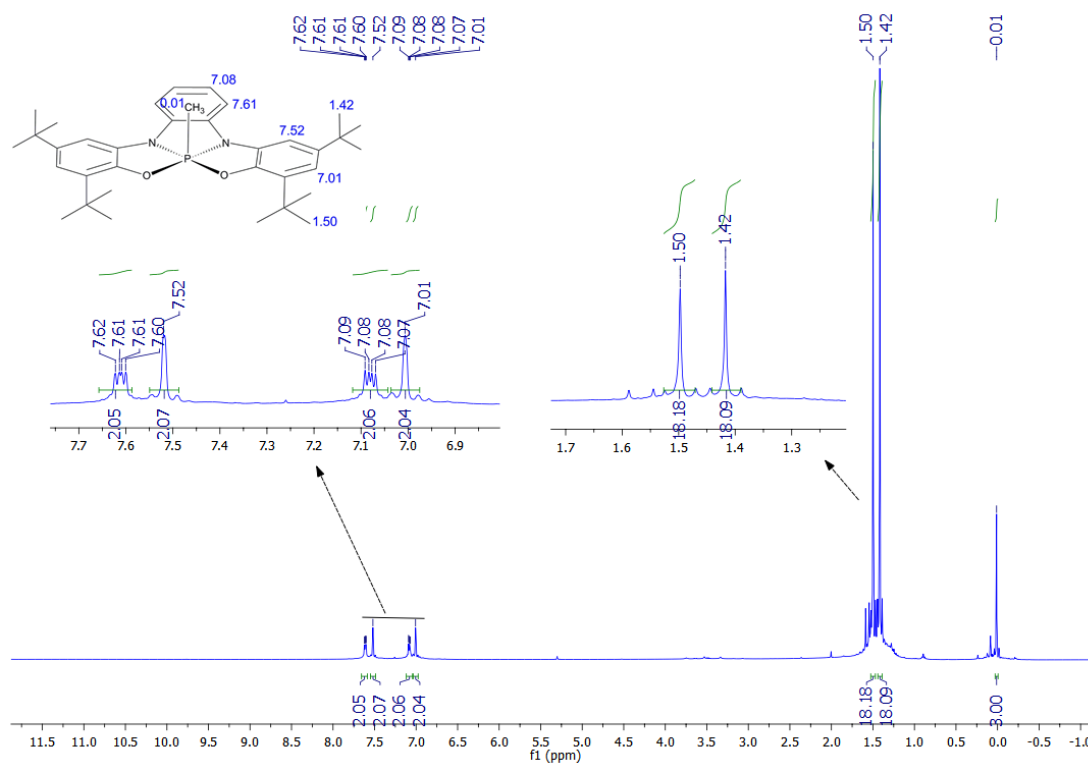

**Figure S26.** <sup>1</sup>H NMR spectrum (400 MHz, CDCl<sub>3</sub>) of **1-Me**.

# SUPPORTING INFORMATION

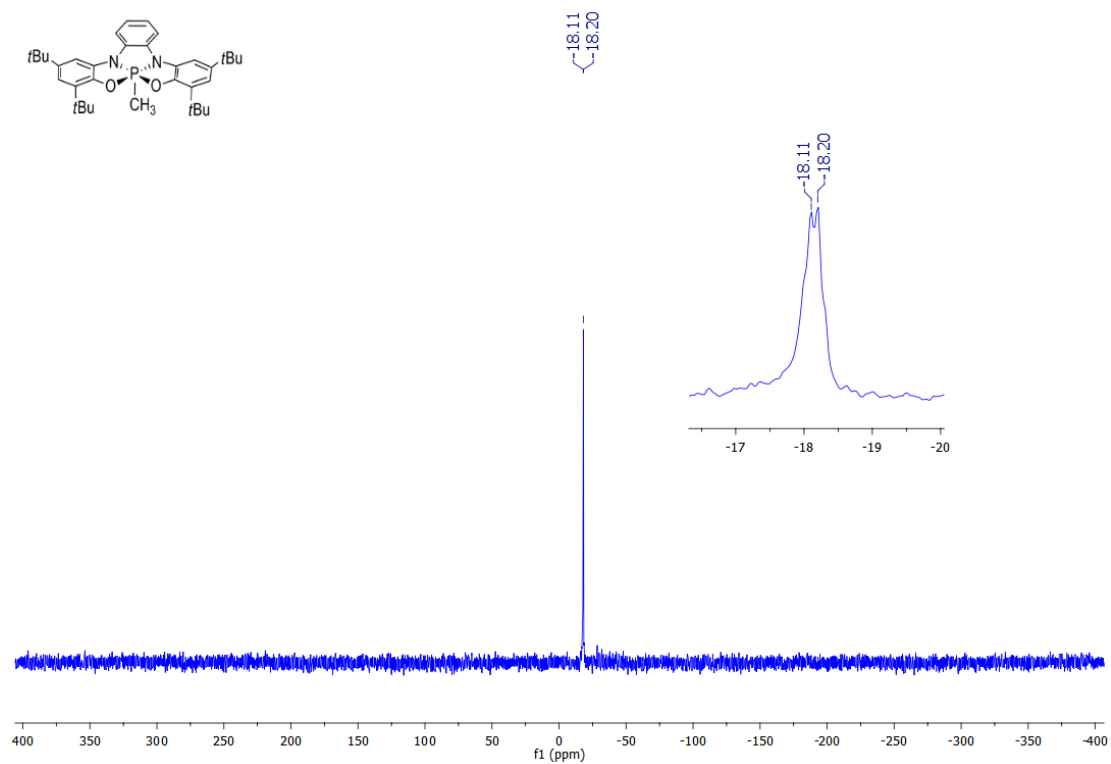

**Figure S27.**  $^{31}\text{P}$  NMR spectrum (162 MHz,  $\text{CDCl}_3$ ) of **1-Me**.

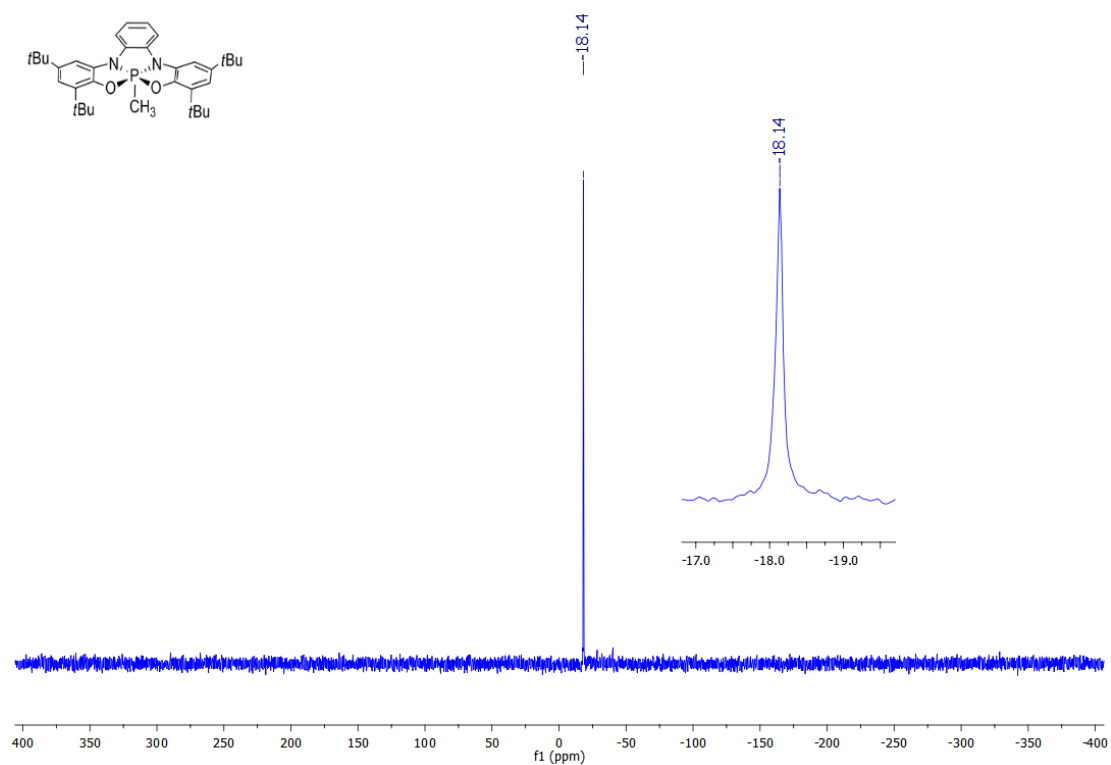

**Figure S28.**  $^{31}\text{P}\{^1\text{H}\}$  NMR spectrum (162 MHz,  $\text{CDCl}_3$ ) of **1-Me**.

## SUPPORTING INFORMATION

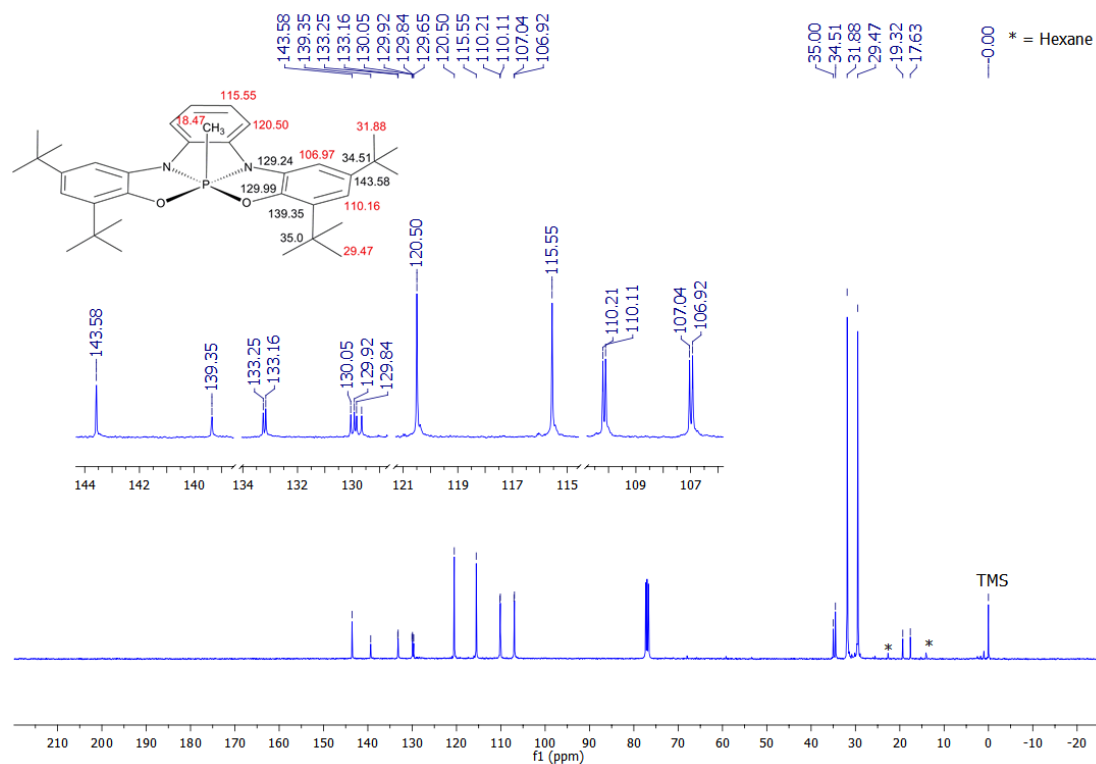

**Figure S29.**  $^{13}\text{C}$  NMR spectrum (100 MHz,  $\text{CDCl}_3$ ) of **1-Me**.

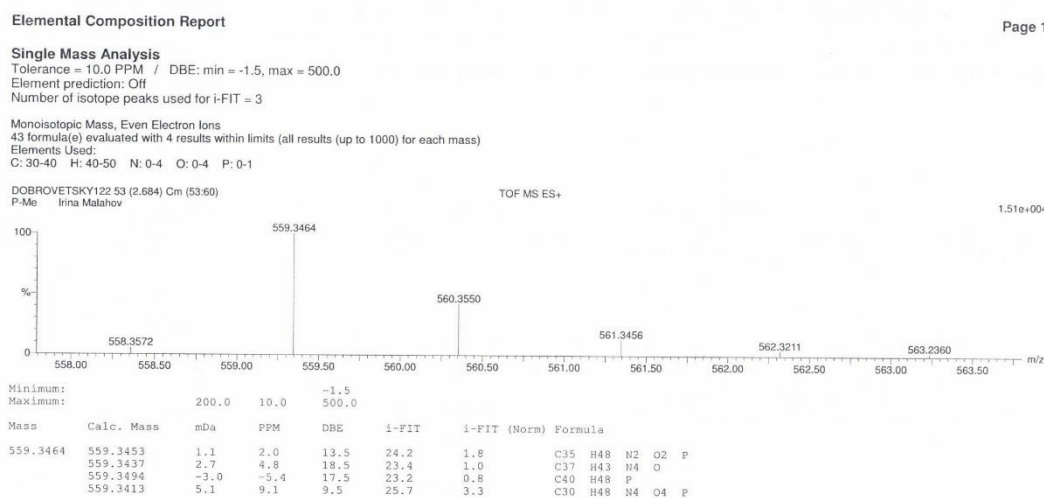

**Figure S30.** HRMS spectrum of **1-Me**.

### 4. Electrochemistry:

The electrochemical measurements were carried out using a CHI760E electrochemical workstation under an inert atmosphere in a glovebox. A 3 mm glassy carbon served as the working electrode,  $\text{Ag}/\text{Ag}^+$  was used as the reference electrode, and a Pt wire as the counter electrode. All electrodes were rinsed with the anhydrous THF prior to use.  $[\text{nBu}_4\text{N}][\text{ClO}_4]$  (0.1 M) in anhydrous THF was used as the supporting electrolyte. Cyclic voltammetry (CV) was performed at a scan rate of 0.1 V/s.

## SUPPORTING INFORMATION

**Calculation of p*K*<sub>a</sub>:** 0.8 mL THF solution of **1-H** (58.7 mg, 0.1077 mmol) was added to an equimolar amount of 9-fluorenyl potassium (22 mg, 0.1077 mmol) at room temperature. <sup>31</sup>P NMR spectrum of this mixture showed an equilibrium between **1-H** (30 %) and **1<sup>-</sup>** (70 %). Based on this equilibrium the p*K*<sub>a</sub> value for **1-H** in THF was calculated as 23.67.<sup>[16]</sup>

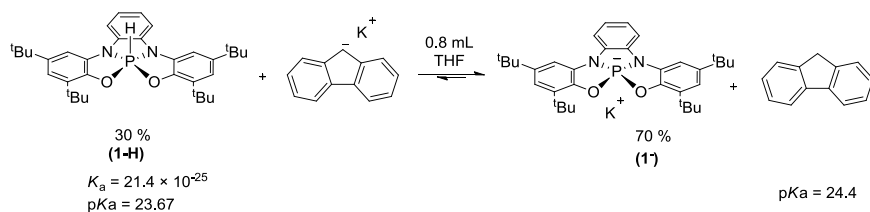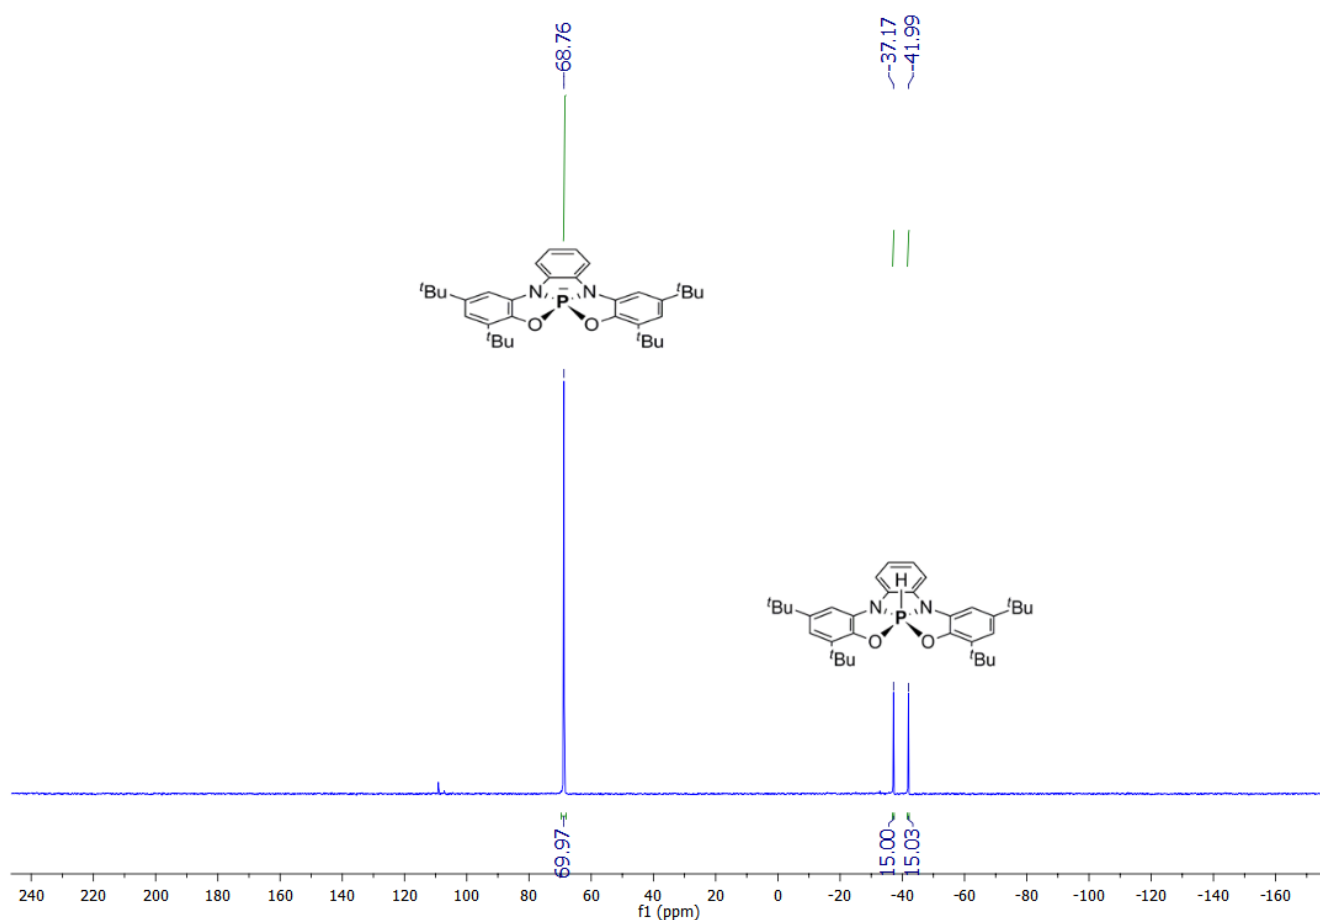

**Figure S31.** <sup>31</sup>P NMR spectrum (162 MHz, CDCl<sub>3</sub>) to show the equilibrium of **1H** and **1<sup>-</sup>**.

**Bond Dissociation Free Energies (BDFE) for 1-H:** BDFE(P-H) for **1-H** was calculated as 111.1775 Kcalmol<sup>-1</sup> using Bordwell equation.<sup>[17]</sup>

$$\text{BDFE}_{\text{sol}}(\text{X-H}) = 1.37pK_a + 23.06E^\circ + C_{G,\text{sol}}$$

The values for  $E^\circ$  and  $C_{G,\text{sol}}$  were used as 1.16 (with respect to ferrocene (0.41))<sup>[18]</sup> and 52, respectively.<sup>[19]</sup>

### 5. EPR measurements:

The EPR spectra were recorded on a Bruker EMX-10/12 X-band ( $\nu = 9.3$  GHz) digital EPR spectrometer equipped with a Bruker N2-temperature controller. The spectra were recorded at a microwave power of

## SUPPORTING INFORMATION

1-50 mW, 100 kHz magnetic field modulation of 0.1-2.0 G amplitude. Digital field resolution was 2048 points per spectrum. This allowed all hyperfine splitting to be measured directly with accuracy better than 0.1 G. Spectra processing and simulation were performed with the Bruker WIN-EPR and SimFonia Software. The g-factor values were determined using 2,2,6,6-tetramethylpiperidine-N-oxyl (TEMPO) as a reference ( $g = 2.0058$ ). When the reactions were carried out under UV irradiation, a high-pressure mercury lamp (1 kW) (ARC lamp power supply model 69920) was used, with the output being focused onto the sample with a quartz lens and filtered through distilled water to remove infrared radiation.

### **Generation of $1^{\bullet}$ radical through $[\text{Ph}_3\text{C}][\text{B}(\text{C}_6\text{F}_5)_4]$ :**

$[\text{Ph}_3\text{C}][\text{B}(\text{C}_6\text{F}_5)_4]$  (95 mg, 0.1 mmol) was added to 0.6 mL  $\text{E}_2\text{O}$  solution of  $[\mathbf{1}^{\bullet}][\text{K}(18\text{-crown-6})]$  (85 mg, 0.1 mmol) at room temperature. A quick EPR measurement showed the formation of  $\text{Ph}_3\text{C}^{\bullet}$  radical. The  $^{31}\text{P}$  NMR spectrum confirmed the formation of **1-1**. All the volatiles were evaporated in vacuum and the mixture was extracted with 5 mL hexane and few drops of acetonitrile were added. The slow evaporation of this solution at room temperature afforded colorless crystals. Yield: 40 mg (37%).

### **Generation of $1^{\bullet}$ radical through tert-butyl peroxide:**

Tert-butyl peroxide (0.8 mL, 4.35 mmol) was added to a J Young NMR tube containing 0.2 mL benzene solution of **1-H** (10 mg, 0.018 mmol). After degassing by a 5-fold freeze-thaw procedure the EPR was recorded under UV-irradiation at 330 K temperature.

### **Generation of $[\mathbf{1}\text{-OCPh}_2]^{\bullet}$ radical:**

**1-H** (10 mg, 0.0184 mmol) and benzophenone (15 mg, 0.0823 mmol) were added to a J Young NMR tube containing 0.8 mL tert-butyl benzene and 0.2 mL (1.0 mmol) tert-butyl peroxide. After degassing by a 3-fold freeze-thaw procedure the sample was UV-irradiated at 300 K (20 min) and observed at 370 K temperature without UV-irradiation.

### **Generation of $[\mathbf{1}\text{-OC}(\text{C}_6\text{F}_5)_2]^{\bullet}$ radical:**

KHMDS (9 mg, 0.0451 mmol) was added to a J Young NMR tube containing 1 mL DME solution of compound **1-H** (23 mg, 0.0442 mmol) at room temperature, followed by the addition of excess decafluorobenzophenone. The EPR was recorded under room temperature without UV-irradiation.

### **Reaction in presence of $\text{C}_{60}$ :**

To support the formation of  $1^{\bullet}$  radical, the radical trap  $\text{C}_{60}$  was used. Into a 25 mL flask,  $\text{C}_{60}$  (22 mg, 0.03 mmol) and tert-butyl benzene (10 mL) were added. Argon was bubbled through the mixture via a capillary for 10 min, the flask was plugged with a glass stopper, and the content was stirred with a magnetic bar for 3 h. To the obtained 1 mL magenta fullerene solution were added **1-H** (10 mg, 0.018 mmol) and one drop of tert-butyl benzene. The solution was transferred into a J. Young NMR tube. After degassing by a 5-fold freeze-thaw procedure the EPR was recorded under UV-irradiation.

An EPR spectrum exhibited a doublet of quintet spectrum [ $a_{\text{P}}(^{31}\text{P}) = 86.9$  G,  $a_{\text{N}}(^{2^{14}}\text{N}) = 0.49$  G,  $g = 2.003$ ] (Figure 28). We also managed to observe two pairs of satellite lines from the interaction of the unpaired electron with the  $^{13}\text{C}$  carbons of the fullerene core [ $a(^{4^{13}}\text{C}) = 3.4$  G;  $a(^{2^{13}}\text{C}) = 8.8$  G]. DFT calculations of the structure, spin density and EPR parameters<sup>[10-15]</sup> of **1-C<sub>60</sub><sup>•</sup>** [ $a(^{31}\text{P}) = 97.0$  G,  $a(^{2^{14}}\text{N}) = 0.24$  G,  $g = 2.002$ ], agree with the experimental data. Importantly, when the irradiation was stopped, the EPR signal dropped significantly and totally disappeared after ~1 min. It is important to note that  $\text{C}_{60}$  radical adducts tend to dimerize through formation of C-C bonds, however, these dimers upon irradiation dissociate back to  $\text{C}_{60}$  based radicals.<sup>[7-9]</sup> In contrast, continuous irradiation of our reaction mixture did not reproduce the signal associated with **1-C<sub>60</sub><sup>•</sup>** adduct. In addition, NMR and MS analysis of the reaction mixture had significant amounts of **1-1** dimer. This means that **1-C<sub>60</sub><sup>•</sup>** probably dissociates back to  $\text{C}_{60}$  and  $1^{\bullet}$ , which dimerizes, making this process irreversible (Figure 28).<sup>[7-9]</sup>

## SUPPORTING INFORMATION

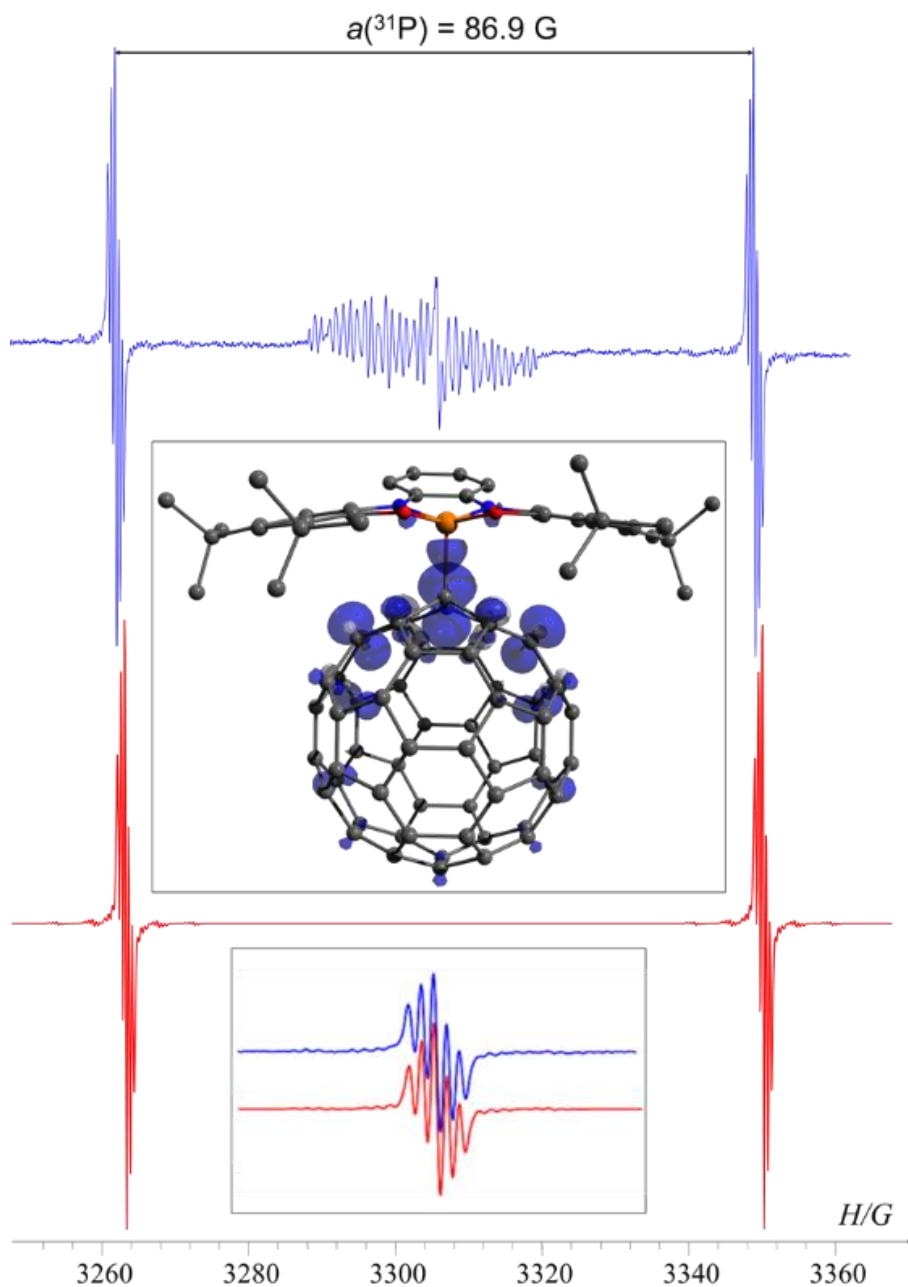

**Figure S32.** EPR spectra of **1-C<sub>60</sub>**<sup>•</sup> under UV-irradiation ( $\lambda > 300\text{nm}$ ) (blue) and its simulation (red); in the top inset the DFT calculated Mulliken atomic spin densities of **1-C<sub>60</sub>**<sup>•</sup>. in the bottom inset expanded multiplet of the low-field component of the doublet (blue) and its simulation (red).

## SUPPORTING INFORMATION

### Analysis Info

Analysis Name D:\Data\Apeloig\Ap\_9037.d  
Method APCI\_pos\_SolidProbe.m  
Sample Name BENFP  
Comment

Acquisition Date 08/08/2021 12:18:38

Operator Larisa Panz  
Instrument maXis impact

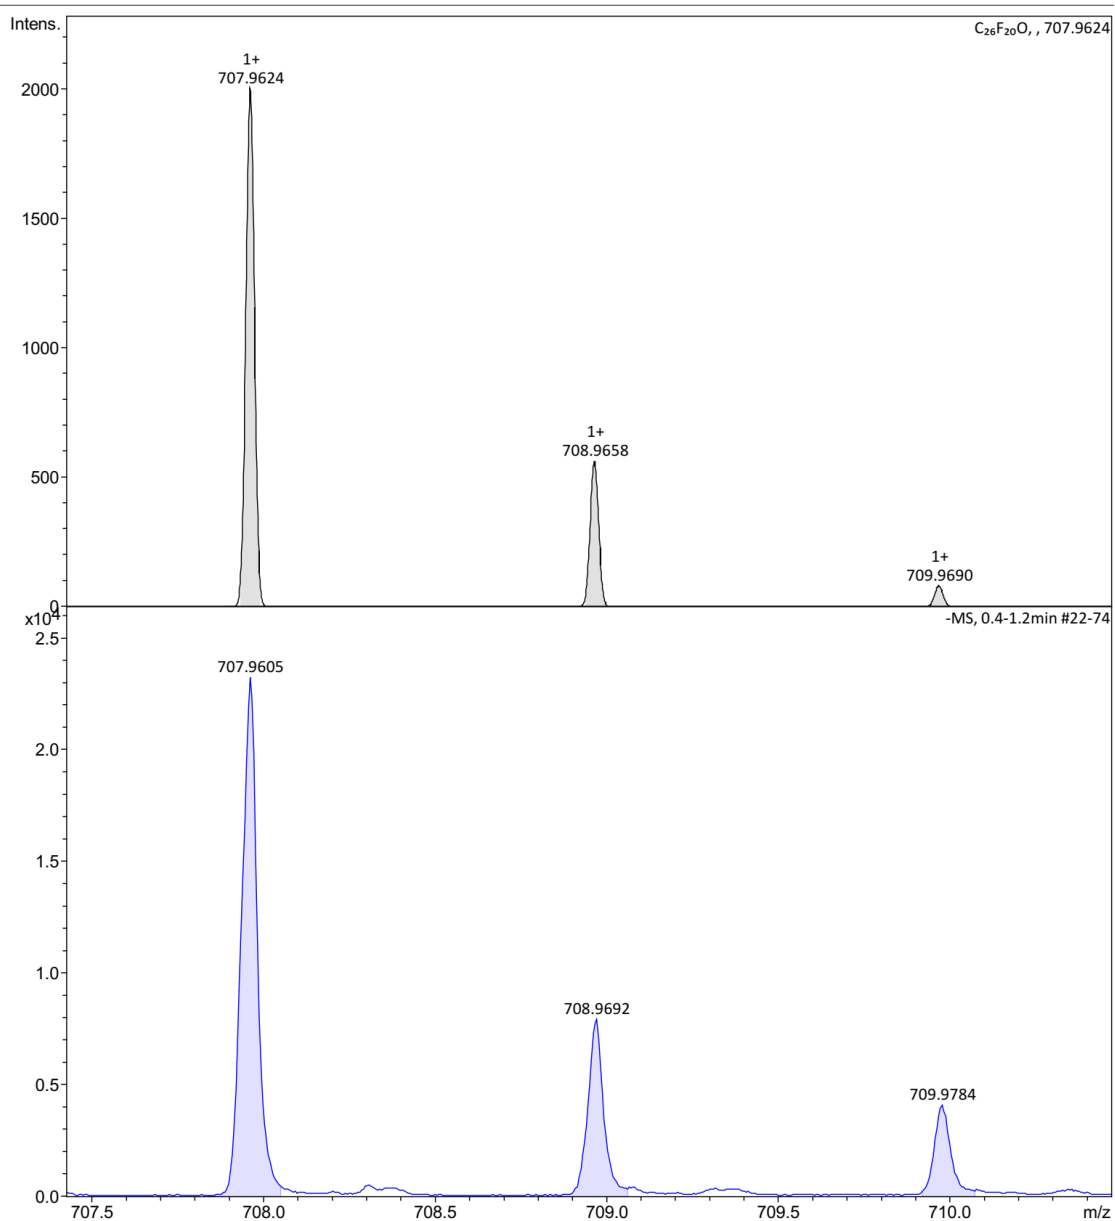

Bruker Compass DataAnalysis 4.2

printed: 08/08/2021 12:30:51

by: Larisa Panz

Page 1 of 1

**Figure S33.** HRMS spectrum (APCI<sup>+</sup>) of tetrakis-(C<sub>6</sub>F<sub>5</sub>)-epoxide. *m/z* calculated for C<sub>26</sub>F<sub>20</sub>O 707.9624 [M]<sup>+</sup>; obs: 707.9605.



## 6. DFT Computations

DFT calculations were performed using Gaussian 09.2.<sup>[10]</sup> Geometry optimizations of **1**<sup>•</sup> and **[1-OCPh<sub>2</sub>]<sup>•</sup>** were optimized using the uwB97XD/def2-TZVP level of theory,<sup>[11,12]</sup> **[1-OC(C<sub>6</sub>F<sub>5</sub>)<sub>2</sub>]<sup>•</sup>** was optimized using uB3LYP-D3/def2-SVP level of theory,<sup>[13-14]</sup> implemented in the Gaussian 09 software. Thermal energy corrections were extracted from the results of frequency analysis performed at the same level of theory. Frequency analysis of all the molecules and intermediates contained no imaginary frequency showing that these are energy minima.

## Optimized geometries

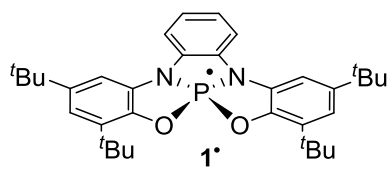

|   |          |          |          |
|---|----------|----------|----------|
| N | -1.21403 | 1.19857  | -0.53189 |
| N | 1.16608  | 1.16086  | -0.37044 |
| P | 0.00473  | -0.03324 | -0.88128 |
| C | -2.46537 | 0.66385  | -0.27849 |
| C | 2.44591  | 0.65417  | -0.16725 |
| C | 2.42086  | -0.72631 | -0.33256 |
| C | 3.55852  | -1.51521 | -0.18896 |
| C | 4.72106  | -0.83025 | 0.14654  |
| C | 4.77996  | 0.54981  | 0.34715  |
| C | 3.62150  | 1.29753  | 0.18852  |
| C | -2.34260 | -0.72059 | -0.12524 |
| C | -3.43292 | -1.52935 | 0.15819  |
| C | -4.65015 | -0.85698 | 0.29102  |
| C | -4.81169 | 0.51589  | 0.15103  |
| C | -3.69306 | 1.28644  | -0.14804 |
| H | 5.63174  | -1.39828 | 0.26781  |
| C | 3.50479  | -3.03129 | -0.37964 |
| H | -5.52602 | -1.44956 | 0.51956  |
| C | -3.41030 | -3.05232 | 0.34912  |
| O | -1.06293 | -1.15206 | -0.25930 |
| O | 1.19186  | -1.20701 | -0.60913 |
| C | -2.03601 | -3.70007 | 0.14658  |
| C | -4.37962 | -3.69222 | -0.65841 |
| C | -3.87279 | -3.37516 | 1.77951  |
| H | -4.07396 | -3.47157 | -1.68282 |
| H | -5.40243 | -3.33679 | -0.52882 |
| H | -4.38517 | -4.77698 | -0.53035 |
| H | -1.64275 | -3.52476 | -0.85385 |
| H | -2.13898 | -4.77848 | 0.28691  |
| H | -1.30136 | -3.33560 | 0.86272  |
| C | 3.04148  | -3.35195 | -1.81013 |
| C | 2.52497  | -3.64420 | 0.63487  |
| C | 4.87394  | -3.68200 | -0.16962 |
| H | 2.05138  | -2.94598 | -2.00928 |
| H | 3.00120  | -4.43421 | -1.95459 |
| H | 3.73888  | -2.93785 | -2.54146 |
| H | 5.61422  | -3.31301 | -0.88262 |
| H | 4.78223  | -4.75939 | -0.31771 |
| H | 5.25336  | -3.51848 | 0.84115  |
| H | -3.19611 | -2.93151 | 2.51221  |
| H | -3.88091 | -4.45656 | 1.93437  |
| H | -4.87748 | -3.00033 | 1.97861  |
| H | 1.51669  | -3.25606 | 0.50223  |
| H | 2.84614  | -3.43118 | 1.65673  |
| H | 2.49194  | -4.72895 | 0.50852  |
| C | -0.72092 | 2.47887  | -0.44480 |
| C | -1.40176 | 3.68836  | -0.46449 |
| C | 0.68653  | 2.45919  | -0.34993 |
| C | -0.68431 | 4.87089  | -0.37777 |
| H | -2.47431 | 3.72162  | -0.56607 |

## SUPPORTING INFORMATION

|   |          |          |          |
|---|----------|----------|----------|
| C | 1.39356  | 3.65191  | -0.29735 |
| C | 0.69952  | 4.85229  | -0.30060 |
| H | -1.21301 | 5.81485  | -0.38969 |
| H | 2.47033  | 3.66457  | -0.27561 |
| H | 1.25097  | 5.78215  | -0.25649 |
| H | -3.78142 | 2.35081  | -0.27144 |
| H | 3.63424  | 2.35744  | 0.36432  |
| C | -6.20035 | 1.13530  | 0.33180  |
| C | 6.11351  | 1.19579  | 0.73501  |
| C | 7.14888  | 0.93473  | -0.36960 |
| H | 8.10581  | 1.39264  | -0.10799 |
| H | 7.31867  | -0.13204 | -0.52012 |
| H | 6.81503  | 1.35838  | -1.31881 |
| C | 5.99263  | 2.71018  | 0.92134  |
| H | 5.67249  | 3.20581  | 0.00226  |
| H | 5.29018  | 2.96705  | 1.71700  |
| H | 6.96504  | 3.12355  | 1.19474  |
| C | 6.61218  | 0.59110  | 2.05643  |
| H | 5.88609  | 0.75591  | 2.85485  |
| H | 6.77727  | -0.48353 | 1.97007  |
| H | 7.55759  | 1.05271  | 2.35093  |
| C | -6.18847 | 2.65285  | 0.13163  |
| H | -5.53571 | 3.15151  | 0.85123  |
| H | -5.86706 | 2.92487  | -0.87611 |
| H | -7.19595 | 3.04796  | 0.27342  |
| C | -7.17350 | 0.52775  | -0.68972 |
| H | -7.27391 | -0.55058 | -0.56015 |
| H | -8.16547 | 0.97135  | -0.57587 |
| H | -6.83026 | 0.71260  | -1.70940 |
| C | -6.70460 | 0.84521  | 1.75386  |
| H | -6.79918 | -0.22595 | 1.93704  |
| H | -6.01808 | 1.25313  | 2.49823  |
| H | -7.68687 | 1.29845  | 1.90758  |

Sum of electronic and zero-point Energies= -1922.856034  
 Sum of electronic and thermal Energies= -1922.817873  
 Sum of electronic and thermal Enthalpies= -1922.816929  
 Sum of electronic and thermal Free Energies= -1922.924928

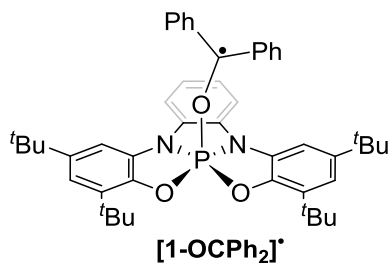

|   |          |          |          |
|---|----------|----------|----------|
| N | -1.22704 | 1.73207  | -0.27664 |
| N | 1.12022  | 1.75604  | 0.05052  |
| C | -2.52507 | 1.32283  | 0.01326  |
| C | 2.40077  | 1.31760  | 0.39985  |
| C | 2.30790  | 0.03264  | 0.91224  |
| C | 3.41185  | -0.69002 | 1.33461  |
| C | 4.63642  | -0.04648 | 1.17136  |
| C | 4.77743  | 1.22454  | 0.61905  |
| C | 3.63534  | 1.91698  | 0.22988  |
| C | -2.46951 | 0.20706  | 0.83443  |
| C | -3.59682 | -0.39502 | 1.36723  |
| C | -4.80683 | 0.14254  | 0.93317  |
| C | -4.90950 | 1.21737  | 0.05016  |
| C | -3.74464 | 1.82466  | -0.40651 |
| H | 5.53070  | -0.56869 | 1.47721  |
| C | 3.27628  | -2.09508 | 1.92065  |
| H | -5.71979 | -0.30331 | 1.29885  |
| C | -3.49778 | -1.51332 | 2.40504  |
| O | -1.18989 | -0.20553 | 1.07138  |
| O | 1.03205  | -0.43142 | 0.92131  |
| C | -2.70913 | -2.70915 | 1.85457  |

## SUPPORTING INFORMATION

---

|   |          |          |          |
|---|----------|----------|----------|
| C | -4.88035 | -2.01498 | 2.82833  |
| C | -2.78607 | -0.95803 | 3.65031  |
| H | -5.43256 | -2.43379 | 1.98427  |
| H | -5.48257 | -1.22460 | 3.28115  |
| H | -4.76236 | -2.80533 | 3.57159  |
| H | -3.19946 | -3.12389 | 0.97481  |
| H | -2.65598 | -3.49194 | 2.61512  |
| H | -1.69273 | -2.43644 | 1.57856  |
| C | 2.66516  | -3.04071 | 0.87469  |
| C | 2.37406  | -2.04607 | 3.16448  |
| C | 4.63272  | -2.66671 | 2.34021  |
| H | 1.65320  | -2.73921 | 0.60994  |
| H | 2.62323  | -4.05577 | 1.27733  |
| H | 3.26518  | -3.05612 | -0.03762 |
| H | 5.30952  | -2.77309 | 1.48988  |
| H | 4.48509  | -3.65863 | 2.77076  |
| H | 5.11949  | -2.04768 | 3.09682  |
| H | -1.76944 | -0.64144 | 3.41906  |
| H | -2.73219 | -1.72981 | 4.42164  |
| H | -3.32923 | -0.10384 | 4.05987  |
| H | 1.37357  | -1.69151 | 2.92086  |
| H | 2.79842  | -1.38475 | 3.92299  |
| H | 2.28337  | -3.04515 | 3.59719  |
| C | -0.72459 | 2.99364  | -0.53189 |
| C | -1.40209 | 4.14895  | -0.87528 |
| C | 0.66648  | 3.01516  | -0.33593 |
| C | -0.68564 | 5.32953  | -1.03253 |
| H | -2.47180 | 4.14715  | -1.01228 |
| C | 1.36817  | 4.19776  | -0.47652 |
| C | 0.68221  | 5.35393  | -0.83469 |
| H | -1.21008 | 6.23520  | -1.30739 |
| H | 2.42896  | 4.24903  | -0.29628 |
| H | 1.23097  | 6.27874  | -0.95324 |
| H | -3.78443 | 2.64828  | -1.09888 |
| H | 3.71716  | 2.88595  | -0.22736 |
| C | -6.29748 | 1.69252  | -0.38986 |
| C | 6.17819  | 1.82169  | 0.45321  |
| C | 7.02673  | 0.90315  | -0.43904 |
| H | 8.02545  | 1.32477  | -0.57515 |
| H | 7.13935  | -0.09080 | -0.00450 |
| H | 6.56755  | 0.78882  | -1.42314 |
| C | 6.14378  | 3.20971  | -0.19134 |
| H | 5.70169  | 3.18216  | -1.18960 |
| H | 5.58328  | 3.92315  | 0.41654  |
| H | 7.16094  | 3.59237  | -0.29247 |
| C | 6.84338  | 1.95230  | 1.83184  |
| H | 6.24987  | 2.59288  | 2.48687  |
| H | 6.95209  | 0.98278  | 2.31974  |
| H | 7.83894  | 2.39147  | 1.73230  |
| C | -6.22950 | 2.89341  | -1.33634 |
| H | -5.74745 | 3.75280  | -0.86546 |
| H | -5.69329 | 2.65588  | -2.25742 |
| H | -7.24115 | 3.19511  | -1.61392 |
| C | -7.01574 | 0.54780  | -1.12065 |
| H | -7.13396 | -0.32686 | -0.47977 |
| H | -8.01056 | 0.86620  | -1.44147 |
| H | -6.45350 | 0.24269  | -2.00577 |
| C | -7.11606 | 2.10643  | 0.84264  |
| H | -7.24787 | 1.27863  | 1.54020  |
| H | -6.62204 | 2.91993  | 1.37755  |
| H | -8.10839 | 2.44930  | 0.53996  |
| P | -0.06302 | 0.52575  | 0.12859  |
| O | -0.09004 | -0.21475 | -1.31108 |
| C | 0.13010  | -1.54059 | -1.59505 |
| C | -1.04932 | -2.38656 | -1.52559 |
| C | -0.98495 | -3.74982 | -1.20637 |
| C | -2.31012 | -1.83264 | -1.79313 |
| C | -2.12316 | -4.53534 | -1.22419 |
| C | -3.44450 | -2.62166 | -1.80332 |
| C | -3.35578 | -3.98120 | -1.53880 |
| C | 1.41057  | -1.87512 | -2.13451 |
| C | 2.44275  | -0.91536 | -2.15489 |

## SUPPORTING INFORMATION

|   |          |          |          |
|---|----------|----------|----------|
| C | 1.70514  | -3.14521 | -2.67489 |
| C | 3.71306  | -1.23600 | -2.58403 |
| C | 2.97728  | -3.45383 | -3.11028 |
| C | 3.99956  | -2.51390 | -3.04638 |
| H | -2.39059 | -0.77702 | -2.01372 |
| H | -4.40418 | -2.16907 | -2.01852 |
| H | -4.24433 | -4.59947 | -1.55213 |
| H | -2.04869 | -5.58596 | -0.97330 |
| H | -0.04199 | -4.18654 | -0.90770 |
| H | 0.92624  | -3.88642 | -2.76988 |
| H | 2.24075  | 0.09208  | -1.82950 |
| H | 4.48574  | -0.47811 | -2.55683 |
| H | 4.99860  | -2.76694 | -3.37703 |
| H | 3.17315  | -4.43906 | -3.51468 |

|                                              |              |
|----------------------------------------------|--------------|
| Sum of electronic and zero-point Energies=   | -2499.364054 |
| Sum of electronic and thermal Energies=      | -2499.314913 |
| Sum of electronic and thermal Enthalpies=    | -2499.313969 |
| Sum of electronic and thermal Free Energies= | -2499.444265 |

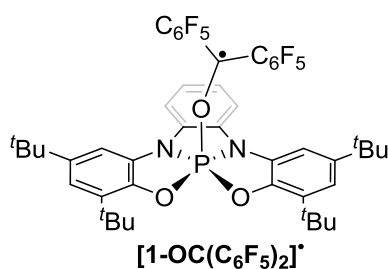

|   |          |          |          |
|---|----------|----------|----------|
| N | -1.59987 | -1.91206 | 0.33722  |
| N | 0.65234  | -2.09706 | -0.37470 |
| C | -2.92471 | -1.53419 | 0.15042  |
| C | 1.79109  | -1.85732 | -1.14422 |
| C | 1.65945  | -0.62119 | -1.75710 |
| C | 2.55123  | -0.15855 | -2.71344 |
| C | 3.66150  | -0.97281 | -2.92566 |
| C | 3.85970  | -2.19589 | -2.28870 |
| C | 2.89040  | -2.65575 | -1.40467 |
| C | -2.96215 | -0.45543 | -0.73015 |
| C | -4.14358 | 0.10883  | -1.17149 |
| C | -5.30093 | -0.45416 | -0.62449 |
| C | -5.30871 | -1.51055 | 0.27515  |
| C | -4.09096 | -2.06552 | 0.66320  |
| H | 4.40287  | -0.64494 | -3.63877 |
| C | 2.27234  | 1.09418  | -3.54604 |
| H | -6.25077 | -0.03245 | -0.92438 |
| C | -4.28590 | 1.25519  | -2.18000 |
| O | -1.70878 | -0.07567 | -1.12192 |
| O | 0.51093  | 0.01462  | -1.39644 |
| C | -2.95911 | 1.75066  | -2.76656 |
| C | -4.97568 | 2.44014  | -1.48676 |
| C | -5.15318 | 0.77445  | -3.35543 |
| H | -4.38655 | 2.78796  | -0.63811 |
| H | -5.96933 | 2.17464  | -1.12304 |
| H | -5.08563 | 3.26952  | -2.18914 |
| H | -2.28886 | 2.13822  | -2.00273 |
| H | -3.16883 | 2.55635  | -3.47325 |
| H | -2.43163 | 0.96093  | -3.30082 |
| C | 2.04068  | 2.31120  | -2.64473 |
| C | 1.00919  | 0.84175  | -4.38728 |
| C | 3.42720  | 1.41870  | -4.49600 |
| H | 1.15216  | 2.17431  | -2.03334 |
| H | 1.89747  | 3.20649  | -3.25426 |
| H | 2.89769  | 2.48121  | -1.99026 |
| H | 4.35837  | 1.60287  | -3.95605 |
| H | 3.18475  | 2.32354  | -5.05599 |
| H | 3.59845  | 0.62104  | -5.22133 |
| H | -4.69345 | -0.08402 | -3.84884 |

## SUPPORTING INFORMATION

|                                              |          |          |              |
|----------------------------------------------|----------|----------|--------------|
| H                                            | -5.25781 | 1.57496  | -4.09114     |
| H                                            | -6.15430 | 0.48258  | -3.03656     |
| H                                            | 0.14382  | 0.64684  | -3.75384     |
| H                                            | 1.15200  | -0.01268 | -5.05172     |
| H                                            | 0.78866  | 1.71844  | -5.00106     |
| C                                            | -1.04640 | -3.08926 | 0.81294      |
| C                                            | -1.61343 | -4.07133 | 1.60465      |
| C                                            | 0.28945  | -3.20167 | 0.39297      |
| C                                            | -0.84440 | -5.16871 | 1.97386      |
| H                                            | -2.62771 | -3.98837 | 1.95910      |
| C                                            | 1.05481  | -4.28314 | 0.78534      |
| C                                            | 0.47470  | -5.27074 | 1.57349      |
| H                                            | -1.28360 | -5.93736 | 2.59599      |
| H                                            | 2.09598  | -4.36238 | 0.52100      |
| H                                            | 1.07273  | -6.11700 | 1.88452      |
| H                                            | -4.06216 | -2.88818 | 1.35434      |
| H                                            | 2.99028  | -3.62189 | -0.94589     |
| C                                            | -6.64522 | -2.03363 | 0.81119      |
| C                                            | 5.12321  | -3.00612 | -2.59541     |
| C                                            | 6.35932  | -2.17721 | -2.21410     |
| H                                            | 7.27311  | -2.73603 | -2.42990     |
| H                                            | 6.40220  | -1.23902 | -2.76866     |
| H                                            | 6.34886  | -1.93690 | -1.14911     |
| C                                            | 5.17372  | -4.32110 | -1.81380     |
| H                                            | 5.16210  | -4.15146 | -0.73498     |
| H                                            | 4.34121  | -4.97932 | -2.07164     |
| H                                            | 6.09729  | -4.85151 | -2.05268     |
| C                                            | 5.17135  | -3.33870 | -4.09427     |
| H                                            | 4.29672  | -3.92151 | -4.38971     |
| H                                            | 5.19583  | -2.43664 | -4.70702     |
| H                                            | 6.06617  | -3.92210 | -4.32390     |
| C                                            | -6.46228 | -3.17865 | 1.81020      |
| H                                            | -5.96741 | -4.03909 | 1.35479      |
| H                                            | -5.88422 | -2.86610 | 2.68257      |
| H                                            | -7.43883 | -3.51228 | 2.16579      |
| C                                            | -7.39025 | -0.89488 | 1.52427      |
| H                                            | -7.61085 | -0.06967 | 0.84620      |
| H                                            | -8.33821 | -1.25851 | 1.92800      |
| H                                            | -6.79501 | -0.50076 | 2.35010      |
| C                                            | -7.49737 | -2.54966 | -0.35814     |
| H                                            | -7.70209 | -1.76397 | -1.08668     |
| H                                            | -6.98820 | -3.36380 | -0.87781     |
| H                                            | -8.45582 | -2.92497 | 0.00873      |
| P                                            | -0.47171 | -0.81742 | -0.36016     |
| O                                            | -0.23153 | 0.03170  | 1.02477      |
| C                                            | 0.55192  | 1.08618  | 1.34054      |
| C                                            | 0.34029  | 2.36932  | 0.70228      |
| C                                            | 1.41765  | 3.21210  | 0.41547      |
| C                                            | -0.92932 | 2.85222  | 0.36912      |
| C                                            | 1.25726  | 4.44053  | -0.19058     |
| C                                            | -1.10842 | 4.07558  | -0.24728     |
| C                                            | -0.01198 | 4.87232  | -0.53578     |
| C                                            | 1.42439  | 0.92033  | 2.48528      |
| C                                            | 2.13744  | -0.26154 | 2.72452      |
| C                                            | 1.59079  | 1.93128  | 3.44397      |
| C                                            | 2.94725  | -0.43144 | 3.82976      |
| C                                            | 2.40539  | 1.78383  | 4.54895      |
| C                                            | 3.08755  | 0.59505  | 4.74862      |
| F                                            | -2.01349 | 2.17083  | 0.71298      |
| F                                            | -2.32691 | 4.51372  | -0.52836     |
| F                                            | -0.17863 | 6.04049  | -1.13007     |
| F                                            | 2.31155  | 5.18763  | -0.48081     |
| F                                            | 2.65675  | 2.81781  | 0.68953      |
| F                                            | 0.92278  | 3.07594  | 3.33634      |
| F                                            | 2.51645  | 2.76387  | 5.43312      |
| F                                            | 3.86528  | 0.44267  | 5.80549      |
| F                                            | 3.61370  | -1.56352 | 4.00026      |
| F                                            | 2.09630  | -1.25446 | 1.85045      |
| Sum of electronic and zero-point Energies=   |          |          | -3491.910331 |
| Sum of electronic and thermal Energies=      |          |          | -3491.851419 |
| Sum of electronic and thermal Enthalpies=    |          |          | -3491.850475 |
| Sum of electronic and thermal Free Energies= |          |          | -3492.004978 |

## SUPPORTING INFORMATION

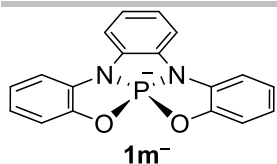

|   |          |          |          |
|---|----------|----------|----------|
| P | -0.03803 | -1.03586 | 0.80332  |
| O | 0.99474  | -1.88427 | -0.33082 |
| O | -1.32339 | -2.10829 | 0.02231  |
| N | 1.25622  | 0.31768  | 0.70987  |
| N | -1.13048 | 0.30268  | 0.31886  |
| C | 0.80950  | 1.55747  | 0.31389  |
| C | 1.54208  | 2.70916  | 0.07888  |
| H | 2.61174  | 2.71286  | 0.23010  |
| C | 0.89807  | 3.86660  | -0.36072 |
| H | 1.47483  | 4.76905  | -0.52520 |
| C | -0.46273 | 3.86035  | -0.58545 |
| H | -0.96392 | 4.75552  | -0.93363 |
| C | -1.21012 | 2.70014  | -0.36963 |
| H | -2.26328 | 2.70155  | -0.60041 |
| C | -0.58708 | 1.55256  | 0.09264  |
| C | 2.47340  | -0.22718 | 0.33335  |
| C | 2.27015  | -1.48862 | -0.25743 |
| C | 3.33581  | -2.22430 | -0.73639 |
| C | 4.62584  | -1.70525 | -0.61412 |
| H | 5.46822  | -2.27901 | -0.98241 |
| C | 4.83566  | -0.47476 | -0.01979 |
| C | 3.75715  | 0.27142  | 0.46083  |
| H | 3.92815  | 1.22137  | 0.94841  |
| C | -2.44418 | -0.10166 | 0.11775  |
| C | -3.61800 | 0.62893  | 0.13313  |
| H | -3.61159 | 1.68686  | 0.34780  |
| C | -4.83774 | -0.01779 | -0.09175 |
| C | -4.87366 | -1.38001 | -0.31714 |
| H | -5.82193 | -1.87489 | -0.49315 |
| C | -3.69852 | -2.13231 | -0.30035 |
| C | -2.48770 | -1.50209 | -0.06403 |
| H | -5.75475 | 0.55882  | -0.08047 |
| H | -3.71135 | -3.20375 | -0.45634 |
| H | 3.15473  | -3.18412 | -1.20305 |
| H | 5.84103  | -0.08446 | 0.08341  |

Sum of electronic and zero-point Energies= -1294.321282  
 Sum of electronic and thermal Energies= -1294.304718  
 Sum of electronic and thermal Enthalpies= -1294.303774  
 Sum of electronic and thermal Free Energies= -1294.365666

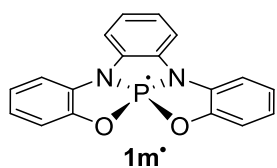

|   |          |          |          |
|---|----------|----------|----------|
| N | 1.21303  | 0.35853  | 0.23060  |
| N | -1.17092 | 0.34268  | 0.11955  |
| P | -0.00178 | -0.86831 | 0.61017  |
| C | 2.47653  | -0.17151 | 0.03403  |
| C | -2.45583 | -0.15887 | -0.04091 |
| C | -2.40817 | -1.55026 | 0.07497  |
| C | -3.53754 | -2.33298 | -0.03285 |
| C | -4.74957 | -1.70176 | -0.27825 |
| C | -4.80969 | -0.32307 | -0.41297 |
| C | -3.66875 | 0.46252  | -0.29657 |
| C | 2.36294  | -1.56137 | -0.04808 |
| C | 3.45425  | -2.37449 | -0.25808 |
| C | 4.69881  | -1.77232 | -0.39505 |
| C | 4.82728  | -0.39387 | -0.31669 |
| C | 3.72269  | 0.42145  | -0.09858 |
| H | -5.65210 | -2.29185 | -0.36759 |

## SUPPORTING INFORMATION

|   |          |          |          |
|---|----------|----------|----------|
| H | 5.57379  | -2.38636 | -0.56252 |
| O | 1.10000  | -2.01810 | 0.07898  |
| O | -1.17424 | -2.04036 | 0.27958  |
| C | 0.72659  | 1.64064  | 0.12133  |
| C | 1.42162  | 2.84120  | 0.08915  |
| C | -0.68087 | 1.63329  | 0.05381  |
| C | 0.71566  | 4.02803  | -0.02412 |
| H | 2.49623  | 2.86413  | 0.16657  |
| C | -1.37609 | 2.83061  | -0.03700 |
| C | -0.66944 | 4.02229  | -0.08415 |
| H | 1.25434  | 4.96591  | -0.05219 |
| H | -2.45253 | 2.85316  | -0.05629 |
| H | -1.21080 | 4.95612  | -0.15761 |
| H | 3.85440  | 1.48948  | -0.03782 |
| H | -3.75052 | 1.52941  | -0.41953 |
| H | 3.32537  | -3.44634 | -0.31954 |
| H | 5.80264  | 0.06206  | -0.42375 |
| H | -3.45853 | -3.40663 | 0.06842  |
| H | -5.75879 | 0.15750  | -0.61005 |

Sum of electronic and zero-point Energies= -1294.235932  
 Sum of electronic and thermal Energies= -1294.219692  
 Sum of electronic and thermal Enthalpies= -1294.218748  
 Sum of electronic and thermal Free Energies= -1294.281494

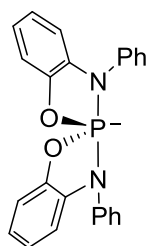

**1ma<sup>-</sup>** :

|   |          |          |          |
|---|----------|----------|----------|
| N | -1.82533 | 0.65447  | -0.47292 |
| C | -1.87901 | 1.51967  | 0.58349  |
| C | -0.57999 | 1.87810  | 0.98256  |
| C | -2.95478 | 2.13253  | 1.22051  |
| C | -0.34312 | 2.80437  | 1.96896  |
| C | -2.71990 | 3.07748  | 2.21960  |
| H | -3.96876 | 1.89936  | 0.92365  |
| C | -1.43249 | 3.41214  | 2.59892  |
| H | -1.26398 | 4.14512  | 3.37818  |
| C | 0.57971  | -1.87765 | 0.98276  |
| C | 0.34265  | -2.80421 | 1.96882  |
| C | 1.87882  | -1.51948 | 0.58368  |
| C | 1.43186  | -3.41253 | 2.59854  |
| H | -0.67846 | -3.04478 | 2.23648  |
| C | 2.95443  | -2.13293 | 1.22043  |
| C | 2.71933  | -3.07815 | 2.21923  |
| H | 3.56504  | -3.55536 | 2.70102  |
| O | 0.40951  | 1.25605  | 0.30260  |
| P | -0.00011 | 0.00027  | -0.74762 |
| H | -3.56572 | 3.55429  | 2.70160  |
| H | 0.67792  | 3.04515  | 2.23664  |
| H | 3.96847  | -1.90005 | 0.92354  |
| H | 1.26316  | -4.14574 | 3.37755  |
| C | -2.89457 | -0.09594 | -0.93246 |
| C | -3.89271 | -0.60957 | -0.09475 |
| C | -2.95746 | -0.41662 | -2.29520 |
| C | -4.91750 | -1.38779 | -0.60531 |
| H | -3.83822 | -0.41608 | 0.96813  |
| C | -3.97579 | -1.20893 | -2.79445 |
| H | -2.18744 | -0.02914 | -2.94969 |
| C | -4.97159 | -1.69474 | -1.95750 |
| H | -5.67566 | -1.77249 | 0.06786  |
| H | -3.99855 | -1.43993 | -3.85352 |
| H | -5.77317 | -2.30740 | -2.35165 |

## SUPPORTING INFORMATION

|   |          |          |          |
|---|----------|----------|----------|
| O | -0.40970 | -1.25501 | 0.30321  |
| N | 1.82537  | -0.65400 | -0.47246 |
| C | 2.89481  | 0.09603  | -0.93205 |
| C | 2.95749  | 0.41711  | -2.29472 |
| C | 3.89345  | 0.60891  | -0.09446 |
| C | 3.97604  | 1.20913  | -2.79397 |
| H | 2.18715  | 0.03019  | -2.94916 |
| C | 4.91843  | 1.38686  | -0.60504 |
| H | 3.83919  | 0.41508  | 0.96837  |
| C | 4.97230  | 1.69423  | -1.95715 |
| H | 3.99863  | 1.44042  | -3.85298 |
| H | 5.67695  | 1.77100  | 0.06805  |
| H | 5.77402  | 2.30668  | -2.35132 |

Sum of electronic and zero-point Energies= -1526.471328  
 Sum of electronic and thermal Energies= -1526.448576  
 Sum of electronic and thermal Enthalpies= -1526.447632  
 Sum of electronic and thermal Free Energies= -1526.525379

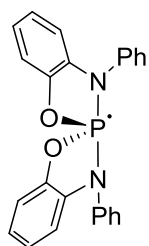

**1ma**

|   |          |          |          |
|---|----------|----------|----------|
| N | -2.04966 | 0.56166  | -0.53507 |
| C | -2.21378 | 1.67168  | 0.29261  |
| C | -0.98286 | 2.28831  | 0.49564  |
| C | -3.35907 | 2.21951  | 0.83955  |
| C | -0.85075 | 3.44075  | 1.22923  |
| C | -3.23802 | 3.38881  | 1.58684  |
| H | -4.32374 | 1.75578  | 0.68338  |
| C | -2.00595 | 3.99191  | 1.78158  |
| H | -1.93568 | 4.90098  | 2.36407  |
| C | 0.68303  | -1.69363 | 0.87549  |
| C | 0.36677  | -2.84127 | 1.58060  |
| C | 2.02843  | -1.43212 | 0.46921  |
| C | 1.35684  | -3.76087 | 1.88299  |
| H | -0.66143 | -3.00046 | 1.87689  |
| C | 3.00934  | -2.41216 | 0.77686  |
| C | 2.67538  | -3.54868 | 1.46906  |
| H | 3.43199  | -4.29292 | 1.68056  |
| O | 0.04320  | 1.64132  | -0.14019 |
| P | -0.38557 | 0.17608  | -0.74631 |
| H | -4.12578 | 3.83150  | 2.01961  |
| H | 0.12110  | 3.89583  | 1.36335  |
| H | 4.01943  | -2.26665 | 0.42000  |
| H | 1.10137  | -4.66077 | 2.42750  |
| C | -3.06875 | -0.38777 | -0.79269 |
| C | -3.76364 | -0.98734 | 0.25312  |
| C | -3.35110 | -0.74934 | -2.10379 |
| C | -4.74243 | -1.92880 | -0.01578 |
| H | -3.52470 | -0.71401 | 1.27284  |
| C | -4.31885 | -1.70686 | -2.36583 |
| H | -2.81072 | -0.27195 | -2.91116 |
| C | -5.02062 | -2.29442 | -1.32529 |
| H | -5.28132 | -2.38876 | 0.80297  |
| H | -4.53114 | -1.98462 | -3.39040 |
| H | -5.78180 | -3.03540 | -1.53290 |
| O | -0.29312 | -0.80775 | 0.62023  |
| N | 2.20148  | -0.30663 | -0.22426 |
| C | 3.42987  | 0.24153  | -0.52142 |
| C | 3.57109  | 0.87518  | -1.76290 |
| C | 4.50024  | 0.28793  | 0.38344  |
| C | 4.76213  | 1.48258  | -2.10894 |
| H | 2.73012  | 0.86498  | -2.44399 |
| C | 5.67842  | 0.92480  | 0.03723  |



## SUPPORTING INFORMATION

|   |         |          |          |
|---|---------|----------|----------|
| H | 4.38200 | -0.13693 | 1.37145  |
| C | 5.82258 | 1.51126  | -1.21186 |
| H | 4.86204 | 1.95135  | -3.07973 |
| H | 6.48925 | 0.96860  | 0.75364  |
| H | 6.74943 | 2.00247  | -1.47834 |

|                                              |              |
|----------------------------------------------|--------------|
| Sum of electronic and zero-point Energies=   | -1526.377557 |
| Sum of electronic and thermal Energies=      | -1526.354758 |
| Sum of electronic and thermal Enthalpies=    | -1526.353814 |
| Sum of electronic and thermal Free Energies= | -1526.433733 |

DFT calculations were performed using Gaussian 09.2.<sup>[10]</sup> Geometry optimizations of all molecules below (**1(MS)<sup>TBP</sup>**, **1(MS)<sup>SP</sup>** and **1'(MS)**) were optimized using the uwB97XD/def2-TZVPP level of theory,<sup>[11,12]</sup> implemented in the Gaussian 09 software. CPCM was used to account for the effect of THF. Thermal energy corrections were extracted from the results of frequency analysis performed at the same level of theory. Frequency analysis of **1(MS)<sup>TBP</sup>** and **1'(MS)** contained no imaginary frequency showing that these are energy minima, frequency analysis of **1(MS)<sup>SP</sup>** contained one imaginary frequency showing that this is a TS related to the Berry pseudo-rotation.

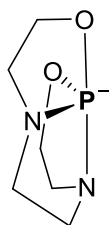

**1(MS)<sup>TBP</sup>** (gas):

|   |          |          |          |
|---|----------|----------|----------|
| P | -0.17831 | -0.47376 | -0.84276 |
| O | -1.85611 | -1.08896 | -0.55170 |
| N | -0.75318 | 0.99527  | -0.03907 |
| C | -2.70178 | -0.28331 | 0.18319  |
| H | -3.26261 | -0.85996 | 0.93662  |
| H | -3.44784 | 0.20244  | -0.47122 |
| C | -1.85575 | 0.79167  | 0.85695  |
| H | -2.42590 | 1.71735  | 1.00791  |
| H | -1.50697 | 0.45673  | 1.85166  |
| C | 0.21722  | 1.96710  | 0.37374  |
| H | -0.16789 | 2.98974  | 0.25600  |
| H | 0.47643  | 1.84859  | 1.44222  |
| C | 1.44682  | 1.72060  | -0.50692 |
| H | 2.32595  | 2.24397  | -0.10549 |
| H | 1.24849  | 2.13773  | -1.50154 |
| N | 1.64011  | 0.30301  | -0.61491 |
| O | 0.31046  | -1.59768 | 0.34694  |
| C | 2.24835  | -0.28233 | 0.54621  |
| H | 1.98333  | 0.21606  | 1.49819  |
| H | 3.34935  | -0.30158 | 0.49331  |
| C | 1.68517  | -1.69050 | 0.56969  |
| H | 1.85129  | -2.19029 | 1.53034  |
| H | 2.16763  | -2.28860 | -0.21788 |

|                                              |             |
|----------------------------------------------|-------------|
| Sum of electronic and zero-point Energies=   | -837.052508 |
| Sum of electronic and thermal Energies=      | -837.042497 |
| Sum of electronic and thermal Enthalpies=    | -837.041553 |
| Sum of electronic and thermal Free Energies= | -837.088083 |

## SUPPORTING INFORMATION

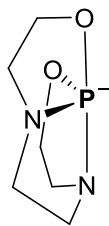

**1(MS)<sup>TBP</sup>** (THF):

|   |          |          |          |
|---|----------|----------|----------|
| P | -0.13337 | -0.48456 | -0.78401 |
| O | -1.77798 | -1.25267 | -0.39912 |
| N | -0.79826 | 0.93367  | -0.00346 |
| C | -2.73130 | -0.36774 | 0.08013  |
| H | -3.42855 | -0.86581 | 0.76738  |
| H | -3.33535 | 0.06118  | -0.73819 |
| C | -1.98729 | 0.75684  | 0.78276  |
| H | -2.58352 | 1.67500  | 0.81752  |
| H | -1.74803 | 0.48352  | 1.82518  |
| C | 0.10670  | 1.97544  | 0.39764  |
| H | -0.34866 | 2.96427  | 0.27345  |
| H | 0.38640  | 1.88336  | 1.46064  |
| C | 1.32431  | 1.79811  | -0.50879 |
| H | 2.19354  | 2.34263  | -0.12659 |
| H | 1.08859  | 2.21330  | -1.49457 |
| N | 1.57580  | 0.38056  | -0.62568 |
| O | 0.46100  | -1.62406 | 0.33409  |
| C | 2.28057  | -0.16051 | 0.51340  |
| H | 1.99677  | 0.30816  | 1.47099  |
| H | 3.36942  | -0.06682 | 0.41775  |
| C | 1.85185  | -1.61064 | 0.53380  |
| H | 2.07265  | -2.10176 | 1.48414  |
| H | 2.36132  | -2.16335 | -0.26705 |

|                                              |             |
|----------------------------------------------|-------------|
| Sum of electronic and zero-point Energies=   | -837.128852 |
| Sum of electronic and thermal Energies=      | -837.118868 |
| Sum of electronic and thermal Enthalpies=    | -837.117924 |
| Sum of electronic and thermal Free Energies= | -837.164537 |

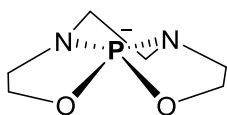

**1(MS)<sup>SP</sup>** (gas):

|   |          |          |          |
|---|----------|----------|----------|
| P | -0.00672 | -0.55767 | -0.61214 |
| O | -1.15462 | -1.53726 | 0.32388  |
| N | -1.22599 | 0.84292  | -0.30911 |
| C | -2.44285 | -1.13061 | 0.04044  |
| H | -3.14845 | -1.62673 | 0.71632  |
| H | -2.73225 | -1.38260 | -0.99539 |
| C | -2.47366 | 0.38550  | 0.22073  |
| H | -3.34920 | 0.83286  | -0.27362 |
| H | -2.55996 | 0.61524  | 1.29966  |
| C | -0.68772 | 1.99056  | 0.35247  |
| H | -1.24329 | 2.91033  | 0.11867  |
| H | -0.71452 | 1.87602  | 1.45630  |
| C | 0.75502  | 2.09380  | -0.11993 |
| H | 1.36605  | 2.62920  | 0.61937  |
| H | 0.79755  | 2.67643  | -1.05421 |
| N | 1.21694  | 0.75526  | -0.30279 |
| O | 1.13430  | -1.58256 | 0.28447  |
| C | 2.44271  | 0.35812  | 0.30072  |
| H | 2.49118  | 0.62333  | 1.37524  |
| H | 3.32948  | 0.80086  | -0.17916 |
| C | 2.43655  | -1.15843 | 0.12699  |
| H | 3.08250  | -1.65034 | 0.86438  |
| H | 2.82736  | -1.40193 | -0.87752 |

## SUPPORTING INFORMATION

Sum of electronic and zero-point Energies= -837.044090  
 Sum of electronic and thermal Energies= -837.034767  
 Sum of electronic and thermal Enthalpies= -837.033823  
 Sum of electronic and thermal Free Energies= -837.078802

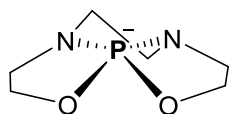

**1(MS)<sup>SP</sup>**

(THF):

|   |          |          |          |
|---|----------|----------|----------|
| P | -0.00842 | -0.53736 | -0.59811 |
| O | -1.15664 | -1.53221 | 0.33704  |
| N | -1.21953 | 0.83999  | -0.32133 |
| C | -2.45273 | -1.13106 | 0.03733  |
| H | -3.16018 | -1.61801 | 0.71319  |
| H | -2.72972 | -1.40418 | -0.99414 |
| C | -2.48265 | 0.38437  | 0.19514  |
| H | -3.34492 | 0.82605  | -0.31853 |
| H | -2.58276 | 0.63056  | 1.26530  |
| C | -0.67914 | 1.97697  | 0.37468  |
| H | -1.24227 | 2.89413  | 0.16880  |
| H | -0.70010 | 1.82709  | 1.47078  |
| C | 0.75552  | 2.09414  | -0.10640 |
| H | 1.37502  | 2.61168  | 0.63353  |
| H | 0.79245  | 2.68919  | -1.02984 |
| N | 1.21655  | 0.75089  | -0.31872 |
| O | 1.13248  | -1.58458 | 0.28459  |
| C | 2.44759  | 0.34887  | 0.28996  |
| H | 2.48721  | 0.61278  | 1.36122  |
| H | 3.32883  | 0.79621  | -0.18624 |
| C | 2.44526  | -1.16293 | 0.11579  |
| H | 3.09270  | -1.65660 | 0.84592  |
| H | 2.82097  | -1.41255 | -0.89007 |

Sum of electronic and zero-point Energies= -837.120454  
 Sum of electronic and thermal Energies= -837.111170  
 Sum of electronic and thermal Enthalpies= -837.110226  
 Sum of electronic and thermal Free Energies= -837.155032

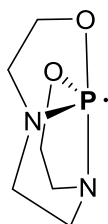

**1(MS)<sup>TBP</sup>**

(gas):

|   |          |          |          |
|---|----------|----------|----------|
| P | -0.08757 | -0.48914 | -0.48341 |
| O | -1.49757 | -1.41701 | -0.34818 |
| N | -0.86886 | 0.79275  | 0.26055  |
| C | -2.64695 | -0.62282 | -0.18472 |
| H | -3.41586 | -1.22395 | 0.29958  |
| H | -3.02607 | -0.28891 | -1.15726 |
| C | -2.23382 | 0.58449  | 0.65966  |
| H | -2.85138 | 1.45775  | 0.43622  |
| H | -2.31596 | 0.37283  | 1.73201  |
| C | -0.14554 | 2.02368  | 0.44034  |
| H | -0.78118 | 2.88558  | 0.22434  |
| H | 0.22505  | 2.13178  | 1.46732  |
| C | 1.00191  | 1.90788  | -0.57474 |
| H | 1.85630  | 2.52906  | -0.30467 |
| H | 0.64634  | 2.23824  | -1.55295 |
| N | 1.38317  | 0.51086  | -0.64906 |
| O | 0.72420  | -1.60643 | 0.37735  |

## SUPPORTING INFORMATION

|   |         |          |          |
|---|---------|----------|----------|
| C | 2.37230 | 0.07222  | 0.31459  |
| H | 2.22921 | 0.53799  | 1.30169  |
| H | 3.39008 | 0.28843  | -0.01828 |
| C | 2.12846 | -1.42135 | 0.41207  |
| H | 2.50339 | -1.85002 | 1.33970  |
| H | 2.58218 | -1.94425 | -0.43349 |

Sum of electronic and zero-point Energies= -837.007087  
 Sum of electronic and thermal Energies= -836.997583  
 Sum of electronic and thermal Enthalpies= -836.996639  
 Sum of electronic and thermal Free Energies= -837.042501

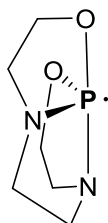

**1\*(MS)<sup>TBP</sup>** (THF):

|   |          |          |          |
|---|----------|----------|----------|
| P | -0.08629 | -0.48264 | -0.48152 |
| O | -1.50236 | -1.42226 | -0.34751 |
| N | -0.86399 | 0.78556  | 0.27069  |
| C | -2.65207 | -0.61502 | -0.18959 |
| H | -3.43113 | -1.21070 | 0.28365  |
| H | -3.01551 | -0.27295 | -1.16417 |
| C | -2.23362 | 0.58093  | 0.66417  |
| H | -2.84330 | 1.45917  | 0.44551  |
| H | -2.31802 | 0.36180  | 1.73391  |
| C | -0.14095 | 2.02140  | 0.44353  |
| H | -0.78189 | 2.87846  | 0.23071  |
| H | 0.23578  | 2.12806  | 1.46681  |
| C | 0.99772  | 1.90902  | -0.57953 |
| H | 1.85343  | 2.52888  | -0.31393 |
| H | 0.63410  | 2.23979  | -1.55419 |
| N | 1.38367  | 0.50833  | -0.65939 |
| O | 0.72567  | -1.61340 | 0.36836  |
| C | 2.36772  | 0.07395  | 0.31828  |
| H | 2.20909  | 0.54105  | 1.30040  |
| H | 3.38649  | 0.29663  | -0.00355 |
| C | 2.13476  | -1.41964 | 0.41509  |
| H | 2.50451  | -1.84377 | 1.34601  |
| H | 2.59510  | -1.94266 | -0.42607 |

Sum of electronic and zero-point Energies= -837.015434  
 Sum of electronic and thermal Energies= -837.005928  
 Sum of electronic and thermal Enthalpies= -837.004984  
 Sum of electronic and thermal Free Energies= -837.050789

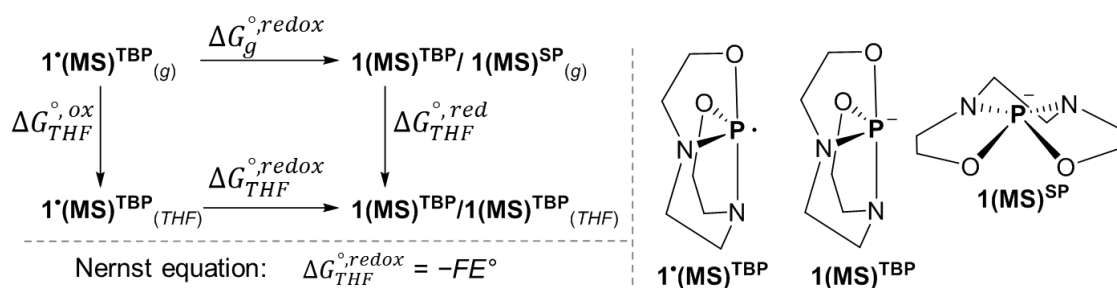

**Figure S34.** Thermodynamic Born-Haber cycle of **1(MS)<sup>TBP</sup>** and of **1(MS)<sup>SP</sup>**.

## SUPPORTING INFORMATION

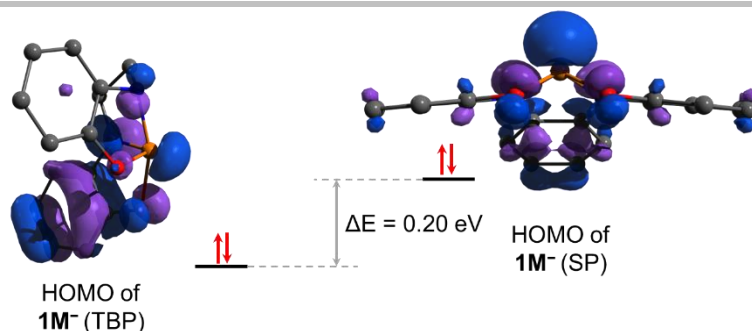

**Figure S35.** Energy difference between HOMO of  $1m^-$  and  $1ma^-$ .

### EPR calculations of radicals $1^\bullet$ , $[1\text{-OCPh}_2]^\bullet$ and $[1\text{-OC}(\text{C}_6\text{F}_5)_2]^\bullet$ .

The EPR calculations for radicals  $1^\bullet$ ,  $[1\text{-OCPh}_2]^\bullet$  and  $[1\text{-OC}(\text{C}_6\text{F}_5)_2]^\bullet$  were calculated at unrestricted TPSS0/def2-TZVPP level of theory<sup>[12]</sup> using the ORCA 4.0 software.<sup>[15]</sup> The calculated EPR parameters and spin density distributions are summarized in Tables 1 and 2, respectively.

**Table S1.** Experimental and DFT calculated EPR parameters for radicals  $1^\bullet$ ,  $[1\text{-OCPh}_2]^\bullet$  and  $[1\text{-OC}(\text{C}_6\text{F}_5)_2]^\bullet$ .

|                                                                | $g_{\text{iso}}$ | $a(^{31}\text{P})$ [G] | $a(^{14}\text{N})$ [G] | $a(^{19}\text{F})$ [G]                                                             | $a(^1\text{H})$ [G]                  |
|----------------------------------------------------------------|------------------|------------------------|------------------------|------------------------------------------------------------------------------------|--------------------------------------|
| $1^\bullet_{\text{Exp.}}$                                      | 2.003            | 607.2                  | 10.2                   | -                                                                                  | -                                    |
| $1^\bullet_{\text{Calc.}}$                                     | 2.003            | 596.7                  | 10.3                   | -                                                                                  | -                                    |
| $[1\text{-OCPh}_2]^\bullet_{\text{Exp.}}$                      | 2.003            | 44.8                   | -                      | -                                                                                  | $4H_o = 3.3; 4H_m = 1.3; 2H_p = 3.6$ |
| $[1\text{-OCPh}_2]^\bullet_{\text{Calc.}}$                     | 2.003            | 43.1                   | -                      | -                                                                                  | $4H_o = 4.4; 4H_m = 2.3; 2H_p = 4.5$ |
| $[1\text{-OC}(\text{C}_6\text{F}_5)_2]^\bullet_{\text{Exp.}}$  | 2.004            | 36.0                   | -                      | $4F_o = 5.8, 3.7, 4.6, 4.1;$<br>$4F_m = 3.6, 3.6, 2.8, 2.7;$<br>$4F_p = 7.5, 6.1$  | -                                    |
| $[1\text{-OC}(\text{C}_6\text{F}_5)_2]^\bullet_{\text{Calc.}}$ | 2.003            | 37.7                   | -                      | $4F_o = 9.2, 5.7, 7.4, 6.6;$<br>$4F_m = 5.9, 5.8, 4.5, 4.3;$<br>$4F_p = 12.0, 9.7$ | -                                    |

## 7. References

- [1] P. Chaudhuri, M. Hess, J. Müller, K. Hildenbrand, E. Bill, T. Weyhermüller, K. Wieghardt, *J. Am. Chem. Soc.*, **1999**, *121*, 9599-9610.
- [2] Bruker (2012). Apex-II. Bruker AXS Inc., Madison, Wisconsin, USA.
- [3] Bruker (2013). SAINT v8.34A. Bruker AXS Inc., Madison, Wisconsin, USA.
- [4] Bruker (2014/5). Sadabs, 2014/5. Bruker AXS Inc., Madison, Wisconsin, USA.
- [5] O. V. Dolomanov, L. J. Bourhis, R. J. Gildea, J. A. K. Howard, H. J. Puschmann, *Appl. Crystallogr.*, **2009**, *42*, 339-341.
- [6] G. M. Sheldrick, *Acta Cryst. A*, **2015**, *71*, 3-8.
- [7] B. Tumanskii, O. Kalina, O. Radical Reactions of Fullerenes and their Derivatives, Kluwer Academic Publishers, Dordrecht, **2002**.
- [8] A. Hirsch, M. Brettreich, Fullerenes: Chemistry and reactions, *Wiley-VCH*, Weinheim, **2005**.
- [9] M. D. Tzirakis, M. Orfanopoulos, *Chem. Rev.* **2013**, *113*, 5262-5321.
- [10] Gaussian 09, Revision D.01, M. J. Frisch, G. W. Trucks, H. B. Schlegel, G. E. Scuseria, M. A. Robb, J. R. Cheeseman, G. Scalmani, V. Barone, B. Mennucci, G. A. Petersson, H. Nakatsuji, M. Caricato, X. Li, H. P. Hratchian, A. F. Izmaylov, J. Bloino, G. Zheng, J. L. Sonnenberg, M. Hada, M. Ehara, K. Toyota, R. Fukuda, J. Hasegawa, M. Ishida, T. Nakajima, Y. Honda, O. Kitao, H. Nakai, T. Vreven, J. A. Montgomery Jr, J. E. Peralta, F. Ogliaro, M. Bearpark, J. J. Heyd, E. Brothers, K. N. Kudin, V. N. Staroverov, T. Keith, R. Kobayashi, J. Normand, K. Raghavachari, A. Rendell, J. C. Burant, S. S. Iyengar, J. Tomasi,

## SUPPORTING INFORMATION

---

- M. Cossi, N. Rega, N. J. Millam, M. Klene, J. E. Knox, J. B. Cross, V. Bakken, C. Adamo, J. Jaramillo, R. Gomperts, R. E. Stratmann, O. Yazyev, A. J. Austin, R. Cammi, C. Pomelli, J. W. Ochterski, R. L. Martin, K. Morokuma, V. G. Zakrzewski, G. A. Voth, P. Salvador, J. J. Dannenberg, S. Dapprich, A. D. Daniels, Ö. Farkas, J. B. Foresman, J. V. Ortiz, J. Cioslowski and D. J. Fox, Gaussian, Inc., Wallingford CT, **2013**.
- [11] (a) F. Weigend, R. Ahlrichs, *Phys. Chem. Chem. Phys.* **2005**, *7*, 3297-3305; (b) J.-D. Chai, M. Head-Gordon, *J. Chem. Phys.* **2008**, *128*, 084106; (c) J.-D. Chai, M. Head-Gordon, *Phys. Chem. Chem. Phys.* **2008**, *10*, 6615-6620; (d) S. Grimme, *J. Chem. Phys. A* **2005**, *109*, 3067-3077; (e) M. M. Quintal, A. Karton, M. A. Iron, A. D. Boese, J. M. L. Martin, *J. Chem. Phys. A* **2006**, *110*, 709-716.
- [12] D. A. Pantazis, X.-Y. Chen, C. R. Landis, F. Neese, *J. Chem. Theory Comput.* **2008**, *4*, 908-919; b) A. Schäfer, C. Huber, R. Ahlrichs, *J. Chem. Phys.* **1994**, *100*, 5829-5835; c) A. Schäfer, H. Horn, R. Ahlrichs, *J. Chem. Phys.* **1992**, *97*, 2571-2577.
- [13] (a) A.D. Becke, *Phys. Rev. A* **1988**, *38*, 3098-3100; (b) A.D. Becke, *J. Chem. Phys.* **1993**, *98*, 5648-5652.
- [14] P. Schwerdtfeger, M. Dolg, W. H. E. Schwarz, G. A. Bowmaker, P. D. W. Boyd, *J. Chem. Phys.* **1989**, *91*, 1762-1774.
- [15] The calculations were carried out using F. Neese, ORCA, version 4.0, an ab initio, density functional and semi-empirical program package (Max Planck Institute for Bioinorganic Chemistry: Mulheim an der Ruhr, Germany, **2012**).
- [16] R. R. Fraser, T. S. Mansour, S. Savard, *J. Org. Chem.* **1985**, *50*, 3232-3234.
- [17] J. J. Warren, T. A. Tronic, J. M. Mayer, *Chem. Rev.* **2010**, *110*, 6961-7001.
- [18] N. G. Connelly, W. E. Geiger, *Chem. Rev.* **1996**, *96*, 877-910.
- [19] C. F. Wise, R. G. Agarwal, J. M. Mayer, *J. Am. Chem. Soc.* **2020**, *142*, 10681-10691.
